## 1           **Direct readout of heterochromatic H3K9me3 regulates DNMT1-** 2           **mediated maintenance DNA methylation**

3  
4   Wendan Ren<sup>1,12</sup>, Huitao Fan<sup>2,3,12</sup>, Sara A Grimm<sup>4</sup>, Yiran Guo<sup>2,3</sup>, Jae Jin Kim<sup>5</sup>, Linhui Li<sup>1</sup>,  
5   Christopher James Petell<sup>2,3</sup>, Xiao-Feng Tan<sup>1</sup>, Zhi-Min Zhang<sup>1,†</sup>, John P. Coan<sup>6</sup>, Jiekai  
6   Yin<sup>7</sup>, Linfeng Gao<sup>7</sup>, Ling Cai<sup>2,3</sup>, Brittany Detrick<sup>1</sup>, Burak Çetin<sup>8</sup>, Yinsheng Wang<sup>7,9</sup>, Qiang  
7   Cui<sup>10</sup>, Brian D. Strahl<sup>2,3</sup>, Or Gozani<sup>6</sup>, Kyle M. Miller<sup>5</sup>, Seán E. O'Leary<sup>1,8</sup>, Paul A. Wade<sup>4</sup>,  
8   Dinshaw J. Patel<sup>11,\*</sup>, Gang Greg Wang<sup>2,3,\*</sup>, Jikui Song<sup>1,7,\*</sup>

9  
10   <sup>1</sup>Department of Biochemistry, University of California, Riverside, CA 92521, USA

11   <sup>2</sup>Lineberger Comprehensive Cancer Center, University of North Carolina at Chapel Hill  
12   School of Medicine, Chapel Hill, NC 27599, USA

13   <sup>3</sup>Department of Biochemistry and Biophysics, University of North Carolina at Chapel Hill  
14   School of Medicine, Chapel Hill, NC 27599, USA

15   <sup>4</sup>Division of Intramural Research, Epigenetics and Stem Cell Biology Laboratory,  
16   National Institute of Environmental Health Sciences, Research Triangle Park,  
17   Durham, NC 27709, USA

18   <sup>5</sup>Department of Molecular Biosciences, LIVESTRONG Cancer Institute of the Dell  
19   Medical School, Institute for Cellular and Molecular Biology, University of Texas at  
20   Austin, Austin, TX 78712, USA

21   <sup>6</sup>Department of Biology, Stanford University, Stanford, CA 94305, USA

22   <sup>7</sup>Environmental Toxicology Graduate Program, University of California, Riverside, CA  
23   92521, USA

24   <sup>8</sup>Cell, Molecular, and Developmental Biology Graduate Program, University of  
25   California, Riverside, Riverside, CA 92521.

26   <sup>9</sup>Department of Chemistry, University of California, Riverside, CA 92521, USA

27   <sup>10</sup>Departments of Chemistry, Physics and Biomedical Engineering, Boston University,  
28   Boston, MA 02215, USA.

29   <sup>11</sup>Structural Biology Program, Memorial Sloan Kettering Cancer Center, New York, NY  
30   10065, USA.

31   <sup>†</sup>Current address: School of pharmacy, Jinan University, 601 Huangpu Avenue West,  
32   Guangzhou 510632, China

33   <sup>12</sup>These authors contributed equally to this work

34   \*Correspondence: pateld@mskcc.org; greg\_wang@med.unc.edu; jikui.song@ucr.edu

35

36 **ABSTRACT**

37

38 In mammals, repressive histone modifications such as trimethylation of histone H3 Lys9  
39 (H3K9me3), frequently coexist with DNA methylation, producing a more stable and  
40 silenced chromatin state. However, it remains elusive how these epigenetic  
41 modifications crosstalk. Here, through structural and biochemical characterizations, we  
42 identified the replication foci targeting sequence (RFTS) domain of maintenance DNA  
43 methyltransferase DNMT1, a module known to bind the ubiquitylated H3 (H3Ub), as a  
44 specific reader for H3K9me3/H3Ub, with the recognition mode distinct from the typical  
45 trimethyl-lysine reader. Disruption of the interaction between RFTS and the  
46 H3K9me3Ub affects the localization of DNMT1 in stem cells and profoundly impairs the  
47 global DNA methylation and genomic stability. Together, this study reveals a previously  
48 unappreciated pathway through which H3K9me3 directly reinforces DNMT1-mediated  
49 maintenance DNA methylation.

## 50 INTRODUCTION

51 DNA methylation is an evolutionarily conserved epigenetic mechanism that critically  
52 influences chromatin structure and function (1). In mammals, DNA methylation  
53 predominantly occurs at the C-5 position of cytosine within the CpG dinucleotide context,  
54 which regulates the silencing of retrotransposons (2), allele-specific genomic imprinting  
55 (3), X-chromosome inactivation (4), and tissue-specific gene expression that underlies  
56 cell fate commitment (5). During DNA replication, DNA methylation is stably propagated  
57 by DNA methyltransferase 1 (DNMT1), which replicates the DNA methylation patterns  
58 from parental DNA strands to the newly synthesized strands in a replication-dependent  
59 manner (6, 7). Faithful propagation of DNA methylation patterns is essential for clonal  
60 transmission of epigenetic regulation between cell generations.

61 DNMT1 is a multi-domain protein, comprised of a large N-terminal regulatory region  
62 and a C-terminal methyltransferase (MTase) domain, linked via a conserved (GK)<sub>n</sub>  
63 dipeptide repeat (Fig. 1A). The regulatory region contains a replication-foci-targeting  
64 sequence (RFTS), a CXXC zinc finger domain and a pair of bromo-adjacent homology  
65 (BAH) domains (8-11). Recent structural and biochemical evidence has revealed that  
66 both the RFTS and CXXC domains regulate the activity of DNMT1 through  
67 autoinhibitory mechanisms: the RFTS domain directly interacts with the MTase domain  
68 to inhibit DNA binding (10-14) whereas the CXXC domain specifically recognizes  
69 unmethylated CpG nucleotides, which in turn blocks the *de novo* methylation activity of  
70 DNMT1 (8, 15). These N-terminal domains-mediated allosteric regulations, together  
71 with an inherent enzymatic preference of the MTase domain for hemimethylated CpG  
72 sites (9, 16), shape the enzymatic specificity of DNMT1 in maintaining DNA methylation.

73 The crosstalk between DNA methylation and other gene silencing mechanisms,  
74 such as histone H3K9 methylation, is widely observed across evolution, ensuring proper  
75 chromatin assembly and loci-specific gene suppression (17, 18). The H3K9 methylation-  
76 dependent DNA methylation in *Neurospora* and *Arabidopsis* has been elucidated, which  
77 is attributed to a direct or indirect H3K9me<sub>2</sub>/H3K9me<sub>3</sub> readout mechanism of DNA  
78 methyltransferases (19, 20). In mammals, H3K9me<sub>3</sub> is strongly correlated with DNA  
79 methylation at pericentric heterochromatin (21). However, the mechanism by which  
80 H3K9 methylation is translated into mammalian DNA methylation remains far from being  
81 fully understood. Nevertheless, it has been established that DNMT1-mediated  
82 maintenance DNA methylation is critically regulated by Ubiquitin-like, containing PHD  
83 and RING Finger domains, 1 (UHRF1) (22, 23). During the S phase, UHRF1 is recruited  
84 to replicating heterochromatin through its association with both hemi-methylated CpG  
85 DNA and H3K9me<sub>3</sub> (24), where it stochastically catalyzes the mono-ubiquitylation of  
86 histone H3 at lysine 14 (H3K14Ub), lysine 18 (H3K18Ub) and/or lysine 23 (H3K23Ub)  
87 (25-28), and PCNA-associated factor 15 (PAF15) at lysine 15 and 24 (29, 30). The  
88 DNMT1 RFTS domain recognizes all these modifications, with a preference for the two-  
89 mono-ubiquitin marks (i.e. H3K18Ub/H3K23Ub), leading to allosteric stimulation of  
90 DNMT1 (28). The structure of DNMT1 RFTS domain in complex with H3K18Ub/K23Ub  
91 revealed that the H3K18Ub/K23Ub binding leads to structural rearrangement of RFTS  
92 and its dissociation with the C-terminal linker, thereby facilitating the conformation  
93 transition of DNMT1 from an autoinhibitory state to an active one (28, 31). These  
94 observations suggest a UHRF1-bridged link between H3K9me<sub>3</sub> and DNA methylation.

95 However, whether H3K9me3 directly interacts with DNMT1 to regulate maintenance  
96 DNA methylation remains unknown.

97 To determine how H3K9me3 affects DNMT1-mediated maintenance DNA  
98 methylation, we examined the histone binding activity of DNMT1 RFTS domain and its  
99 relationship to the chromatin association and enzymatic activity of DNMT1. Through  
100 Isothermal Titration Calorimetry (ITC) and *in vitro* enzymatic assays, we identified that  
101 the RFTS domain binds preferably to H3K9me3 over H3K9me0, which serves to  
102 strengthen the enzymatic stimulation of DNMT1 by H3 ubiquitylation (H3Ub).  
103 Furthermore, we determined the crystal structure of bovine RFTS domain complexed  
104 with H3K9me3 peptide and two ubiquitins, providing the molecular basis for the  
105 H3K9me3 recognition. In addition, our cellular and genomic methylation analysis  
106 demonstrated that impairment of the RFTS-H3K9me3Ub recognition led to reduced co-  
107 localization of DNMT1 with H3K9me3, a global loss of DNA methylation patterns and  
108 genome instability in mouse embryonic stem (ES) cells. Together, this study provides a  
109 mechanism by which H3K9me3 directly regulates DNMT1-mediated maintenance DNA  
110 methylation in mammalian cells.

111

## 112 RESULTS

113 **The RFTS domain of DNMT1 is an H3K9me3Ub reader module.** Recent studies have  
114 indicated that UHRF1-mediated recognition of H3K9me3 and hemi-methylated CpG  
115 DNA stimulates its E3 ubiquitin ligase activity on histone H3 (27, 32), thus providing a  
116 linkage between H3K9me3 and H3 ubiquitylation during UHRF1/DNMT1-mediated DNA  
117 methylation. This observation prompted us to ask whether or not H3K9me3 directly  
118 influences the interaction between the RFTS domain of DNMT1 and ubiquitylated H3.  
119 To this end, we performed ITC assays using the purified human DNMT1 RFTS domain  
120 (hDNMT1<sub>RFTS</sub>) and histone H3 peptides (residues 1-22, H3<sub>1-22</sub>), either unmodified or  
121 with H3K9me3 modification (H3<sub>1-22</sub>K9me3) (Table S1). Titration of hDNMT1<sub>RFTS</sub> with  
122 H3<sub>1-22</sub> gives a dissociation constant ( $K_d$ ) of 6.4  $\mu$ M (Fig. 1B). In comparison, titration of  
123 hDNMT1<sub>RFTS</sub> with H3<sub>1-22</sub>K9me3 gives a  $K_d$  of 1.3  $\mu$ M, suggesting that hDNMT1<sub>RFTS</sub> has  
124 a ~5-fold binding preference for H3K9me3 over unmodified H3 tails (Fig. 1C).  
125 Furthermore, we probed the interaction of hDNMT1<sub>RFTS</sub> with the H3<sub>1-22</sub> peptide  
126 acetylated at K9 (H3<sub>1-22</sub>K9Ac) and other histone tri-methylations (H3K4me3, H3K27me3,  
127 H3K36me3 and H4K20me3) and observed a much weaker binding (Fig. S1A-S1E).  
128 These observations not only confirm the previously observed interaction between  
129 hDNMT1<sub>RFTS</sub> and H3 (28), but also support a preferential binding of H3K9me3 over  
130 H3K9me0 by hDNMT1<sub>RFTS</sub>.

131 Next, we asked whether H3K9me3 can enhance the interaction between  
132 H3K18Ub/K23Ub and the RFTS domain in the context of full-length DNMT1. Following  
133 a previously established approach (28, 33), we installed dual ubiquitin marks onto a  
134 K18C/K23C mutant form of H3<sub>1-24</sub> (H3<sub>1-24</sub>Ub2) or H3<sub>1-24</sub>K9me3 (H3<sub>1-24</sub>K9me3Ub2)  
135 peptides through dichloroacetone (DCA) linkage (33), followed by ITC binding assay  
136 against a hDNMT1 fragment (residues 351-1600, hDNMT<sub>351-1600</sub>) spanning from the  
137 RFTS domain to the C-terminal MTase domain (Fig. 1A). We found that hDNMT<sub>351-1600</sub>  
138 binds to the H3<sub>1-24</sub>K9me3Ub2 peptide with a  $K_d$  of 17 nM (Fig. 1D), exhibiting a ~5-fold

139 binding preference over the H3<sub>1-24</sub>Ub2 peptide ( $K_d = 91$  nM) (Fig. 1E). These data  
140 support that, together with H3Ub, H3K9me3 provides a signal for tethering DNMT1 onto  
141 chromatin via its RFTS domain.

142 **The H3K9me3 readout boosts the stimulation effect of H3Ub on DNMT1 activity.** In  
143 light of a previous study showing that recognition of H3Ub by the DNMT1 RFTS domain  
144 results in enhanced enzymatic activity of DNMT1 (28), we have further evaluated the  
145 effect of H3K9me3 on the enzymatic stimulation of hDNMT1. Here, we found that,  
146 consistent with the previous observation (28), incubation of hDNMT1<sub>351-1600</sub> with  
147 equimolar H3K18Ub and H3Ub2 led to enhanced hDNMT1<sub>351-1600</sub> activity by 1.3 and 14  
148 fold, respectively (Fig. 1F). In contrast, incubation with equimolar H3K9me3/K18Ub and  
149 H3K9me3Ub2 promoted the enzymatic activity of hDNMT1<sub>351-1600</sub> by 2.2 and 36 fold,  
150 respectively. Note that incubation of hDNMT1<sub>351-1600</sub> with equimolar H3K9me0 or  
151 H3K9me3 did not change its activity appreciably (Fig. 1F), although at increased  
152 peptide concentrations, the activity of hDNMT1<sub>351-1600</sub> is significantly higher when  
153 incubated with H3K9me3, relative to H3K9me0 peptide controls (Fig. S1F). Together,  
154 these results show the specific recognition of H3K9me3 over H3K9me0 by hDNMT1<sub>RFTS</sub>  
155 elevates the stimulation effect of H3Ub, a transient ligand of hDNMT1<sub>RFTS</sub> as previously  
156 shown (25, 28).

157 **The structure of RFTS domain in complex with H3K9me3 peptide and two-mono**  
158 **ubiquitin.** To gain a molecular understanding of the RFTS-H3K9me3 recognition, we  
159 next crystallized the complex of the RFTS domain from bovine DNMT1 (bDNMT1<sub>RFTS</sub>)  
160 with both the H3<sub>1-24</sub>K9me3/K18C/K23C peptide and G76C-mutated ubiquitin, and  
161 solved the structure at 3.0 Å resolution (Fig. 2A and Table S2). The structure reveals a  
162 bDNMT1<sub>RFTS</sub>-H3K9me3-Ub2 complex, with clearly traced H3 peptide from Arg2 to  
163 Leu20 (Fig. 2B). The bDNMT1<sub>RFTS</sub> domain folds into a two-lobe architecture, with an N-  
164 lobe harboring a zinc finger and a C-lobe dominated by a helical bundle (Fig. 2A),  
165 resembling that of hDNMT1<sub>RFTS</sub> (11, 14, 28, 31). Like the previously reported  
166 hDNMT1<sub>RFTS</sub>-H3K18Ub/K23Ub complex (28), the H3K9me3 peptide traverses across  
167 the surface of the C-lobe and N-lobe of the bDNMT1<sub>RFTS</sub> domain and engages  
168 extensive intermolecular interactions, with the side chain of H3K9me3 residue  
169 embraced by a surface groove at the interface between bDNMT1<sub>RFTS</sub> and one of the  
170 ubiquitin molecules (Fig. 2B and C). The two ubiquitin molecules are mostly positioned  
171 at the N-lobe of the RFTS domain, separated by the ubiquitin recognition loop (URL;  
172 residues 386-398), and interact with the RFTS domain and H3 in a fashion similar to  
173 what was previously observed for the hDNMT1<sub>RFTS</sub>-H3K18Ub/K23Ub complex (Fig. 2C-  
174 F) (28). Of particular note, residue G76C of one ubiquitin and H3 K18C are positioned  
175 in a distance that allows disulfide bond formation, while the C-terminus of the other  
176 ubiquitin is near to the side chain of H3K14 and also likely accessible to the disordered  
177 H3K23 (Fig. 2G), reminiscent of the close proximity of these moieties in the  
178 hDNMT1<sub>RFTS</sub>-H3K18Ub/K23Ub complex. Note that in the hDNMT1<sub>RFTS</sub>-  
179 H3K18Ub/K23Ub complex, the H3 peptide was conjugated with two G76C-mutated  
180 ubiquitins through disulfide linkages before mixing with hDNMT1<sub>RFTS</sub>, whereas in the  
181 current complex, no covalent linkage was involved between the H3K9me3 peptide and  
182 the ubiquitins prior to the complex assembly. In this regard, the similar positioning of H3  
183 and ubiquitins between the two complexes, crystallized under different conditions,  
184 reinforces the notion that H3 and ubiquitin molecules are able to engage DNMT1<sub>RFTS</sub> via



185 independent inter-molecular interactions (28). These results also indicate that H3K9me3  
186 and H3Ub2 may act synergistically or independently for associating DNMT1 onto  
187 chromatin.

188 Strikingly, in our structure, we found that both DNMT1 and H3Ub contribute to  
189 H3K9me3 engagement. First, H3K9me3 stacks its side chain against the indole ring of  
190 bDNMT1<sub>RFTS</sub> W463, with the quaternary ammonium group interacting with the side  
191 chain carboxylates of bDNMT1<sub>RFTS</sub> E461 and E483 through electrostatic attractions (Fig.  
192 3A). In addition, residues R72-G75 of one of the bound ubiquitins make both main-chain  
193 and side-chain van der Waals contacts with H3K9me3 from an opposite direction,  
194 leading to formation of an H3K9me3-binding pocket (Fig. 3A). Such an H3K9me3-  
195 binding site of DNMT1<sub>RFTS</sub> is distinct from the multi-walled aromatic cage typical for a  
196 trimethyl-lysine (Kme3) reader (34), but is reminiscent of the interaction between the  
197 PHD finger domain of E3 ubiquitin ligase TRIM33 and H3K9me3 (Fig. S2A) (35).  
198 Through superimposition with the previously determined hDNMT1<sub>RFTS</sub>-H3K18Ub/K23Ub  
199 structure (28), we found that those two structures overlap very well, with a root-mean-  
200 square deviation (RMSD) of 0.6 Å over 384 aligned C $\alpha$  atoms (Fig. S2B). However, in  
201 comparison to the H3K9me0 binding, association of H3K9me3 with bDNMT1<sub>RFTS</sub> W463  
202 leads to an increase in buried surface area of the H3K9-engaging pocket by 8-9 Å<sup>2</sup> (Fig.  
203 S2B).

204 Sequence analysis of the DNMT1 RFTS domains reveals that both the H3K9me3-  
205 and ubiquitin-binding sites are highly conserved across evolution (Fig. S2C). Among  
206 these, a di-tryptophan motif (W462 and W463 in bDNMT1) is unvaried from zebrafish to  
207 human (Fig. S2C), in line with their important roles in binding to H3K9me3 and  
208 surrounding H3 tail residues (Fig. 2C and 3A).

209 **Mutational analysis of the DNMT1-H3K9me3Ub2 binding.** To test the above  
210 structural observations, we selected hDNMT1 W464 and W465, corresponding to  
211 bDNMT1 W462 and W463, respectively (Fig. S2C), for mutagenesis. Using  
212 Electrophoretic Mobility Shift Assays (EMSA), we found that the mutation of hDNMT1  
213 W465 into alanine (W465A) leads to a significant reduction in the H3K9me3Ub2-binding  
214 affinity of hDNMT1<sub>RFTS</sub> and hDNMT1<sub>351-1600</sub> (Fig. 3B and C), while the W464A/W465A  
215 mutation reduced the hDNMT1<sub>RFTS</sub>-H3K9me3Ub2 binding even further (Fig. 3B) and led  
216 to nearly undetectable binding between hDNMT1<sub>351-1600</sub> and H3K9me3Ub2 (Fig. 3C).  
217 Likewise, the ITC assays indicated that the W465A mutation reduced the H3K9me0-  
218 and H3K9me3-binding affinities of hDNMT1<sub>RFTS</sub> by ~5 and ~17 fold, respectively (Fig.  
219 3D and E); introduction of a W464A/W465A mutation largely abolished the  
220 hDNMT1<sub>RFTS</sub>-H3K9me3 binding (Fig. 3F). Furthermore, we performed *in vitro* DNA  
221 methylation assays to evaluate the effect of these mutations on the enzymatic activity of  
222 DNMT1. Unlike wild-type hDNMT1<sub>351-1600</sub>, which shows substantial increase in  
223 methylation efficiency in the presence of H3K9me3K18Ub and H3K9me3Ub2 (Fig. 1F)  
224 as well as an enzymatic preference for H3K9me3 over H3K9me0 (Fig. S1F),  
225 introduction of the W465A or W464A/W465A mutation into hDNMT1<sub>351-1600</sub> greatly  
226 dampened the methylation-stimulating effects of H3K9me3, H3K9me3K18Ub or  
227 H3K9me3Ub2 (Fig. 3G and Fig. S3A and B). These data support the important roles of

228 the W464 and W465 residues in mediating the DNMT1-H3K9me3/H3Ub interaction and  
229 the consequent enzymatic activation of DNMT1.

230 Given that H3Ub is reportedly a transient mark in cells (36), we have focused on  
231 examining the requirement of the DNMT1<sub>RFTS</sub> domain for H3K9me3 binding in cells. To  
232 this end, we used the Dnmt1-knockout mouse embryonic stem cells (1KO-ESC) (37)  
233 and generated multiple 1KO-ESC lines with comparable, stable expression of  
234 exogenous DNMT1, either wild-type (DNMT1<sup>WT</sup>) or an H3K9me3-binding-defective  
235 mutant (DNMT1<sup>W465A</sup> or DNMT1<sup>W464A/W465A</sup>) (Fig. 3H). By co-immunoprecipitation  
236 (CoIP), we found that both the W464A and W464A/W465A mutations interfere with  
237 efficient binding of DNMT1 to H3K9me3, but not H4K20me3, in cells (Fig. 3I).  
238 Furthermore, in the ES cells synchronized at S phase, confocal immunofluorescence  
239 (IF) microscopy showed punctate nuclear foci of DNMT1<sup>WT</sup> that overlap with the  
240 H3K9me3-marked, DAPI-dense regions of chromatin (Fig. 3J), whereas the RFTS-  
241 mutant DNMT1 proteins show a more diffuse distribution in the nucleus and lose their  
242 co-localization with H3K9me3 (Fig. 3J). Together, these data support that the histone-  
243 engaging activity of the RFTS domain is critical for both the enzymatic stimulation and  
244 chromatin occupancy of DNMT1.

245 **The RFTS domain of DNMT1 is crucial for global DNA methylation in cells.** Next,  
246 we sought to examine the role of the DNMT1 RFTS domain in maintenance DNA  
247 methylation in cells. First, we used liquid chromatography-mass spectrometry (LC-MS)  
248 to quantify global levels of methylated cytosine (5mC) in 1KO-ESC cells reconstituted  
249 with DNMT1<sup>WT</sup> or the RFTS-defective mutant. As expected, stable transduction of  
250 DNMT1<sup>WT</sup> led to an increase in overall 5mC level (Fig. 4A, WT vs. 1KO). However, such  
251 an increase was found compromised by the W465A or W464A/W465A mutation, with  
252 the latter exhibiting a more severe DNA methylation defect, lacking significant  
253 methylation-stimulating effect relative to mock (Fig. 4A). Further, we carried out  
254 genome-wide methylation profiling with enhanced reduced representation bisulfite  
255 sequencing (eRRBS). Our eRRBS data showed the desired bisulfite conversion rates  
256 (Fig. S4A, 99.79-99.83%; and Table S3), with at least 5-fold coverage for ~5-8 million of  
257 CpG sites in all samples. Relative to 1KO-ESCs reconstituted with DNMT1<sup>WT</sup>, those  
258 with DNMT1<sup>W465A</sup> or DNMT1<sup>W464A/W465A</sup> showed a marked decrease in overall CpG  
259 methylation, with a complete loss of most heavily methylated CpG sites that are typically  
260 seen at heterochromatic repetitive elements (38) (Fig. 4B, red; and Fig. S4B and C). In  
261 particular, there is a significantly decreased level of CpG methylation at the H3K9me3-  
262 decorated genomic regions in cells reconstituted with either DNMT1<sup>W465A</sup> or  
263 DNMT1<sup>W464A/W465A</sup>, relative to DNMT1<sup>WT</sup> controls (Fig. 4C), as demonstrated by sub-  
264 telomeric regions located in the chromosomes 1 and X (Fig. 4D and Fig. S4D). Again,  
265 these cellular assays show that the double RFTS mutant (DNMT1<sup>W464A/W465A</sup>) produced  
266 more severe CpG methylation defects, relative to DNMT1<sup>W465A</sup> (Fig. 4A-D and Fig. S4A-  
267 D), which is consistent with our *in vitro* biochemical and enzymatic observations.  
268 Collectively, we have demonstrated an essential role of the histone-engaging RFTS  
269 domain in maintenance of CpG methylation at the H3K9me3-associated  
270 heterochromatin in cells.

271 Maintenance of proper DNA methylation levels in cells is crucial for genome  
272 stability (39). To investigate the role of DNMT1-mediated DNA methylation in genome  
273 stabilization, we further challenged 1KO-ESC cells, reconstituted with WT or mutant  
274 DNMT1, with ionizing radiation (IR) treatment. By using the neutral comet assay (Fig.  
275 4E), a surrogate method for scoring DNA double-strand break (DSB) lesions, we found  
276 that loss of DNMT1 rendered ESC cells a hyper-sensitivity to IR treatment, reflecting a  
277 possible change in chromatin structure or impairment in DSB repair (Fig. 4E and F), a  
278 phenotype that can be rescued by complementation with WT DNMT1. Whereas cells  
279 with the RFTS single mutant (DNMT1<sup>W465A</sup>) and double mutant (DNMT1<sup>W464A/W465A</sup>)  
280 exhibited modest and severe impairment of IR resistance (Fig. 4E and F), respectively,  
281 confirming the role of DNMT1-mediated DNA methylation in genomic stability  
282 maintenance.

283 Together, the above results strongly indicated that the recognition of H3K9  
284 trimethylation by DNMT1 is important for maintenance DNA methylation, and also  
285 genome stability and radiation resistance of ES cells.

286

## 287 Discussion

288 The crosstalk between H3K9 methylation and DNA methylation, two of the major  
289 epigenetic silencing mechanisms, critically influences gene silencing and  
290 heterochromatin formation (17, 18). For instance, previous studies have demonstrated  
291 that Suv39h-mediated H3K9-trimethylation promotes the enrichment of DNA  
292 methylation at major satellite repeats of pericentromeric heterochromatin (40), which is  
293 essential for maintaining heterochromatic assembly and genome stability (41). Whereas  
294 the mechanism by which H3K9 methylation and DNA methylation crosstalk has been  
295 established in fungi and plants (19, 20), how H3K9me3 is translated into DNA  
296 methylation in mammals remains elusive. Through a set of structural, biochemical and  
297 cellular analyses, this study shows that the RFTS domain of DNMT1 specifically  
298 recognizes H3K9me3 over H3K9me0, in conjunction with the previously identified H3Ub  
299 mark. The readout of H3K9me3 not only enhances the stimulation effect of H3Ub on  
300 DNMT1 activity but also regulates the genome targeting of DNMT1. This study therefore  
301 establishes a direct link between histone H3K9me3 modification and DNMT1-mediated  
302 maintenance DNA methylation, which influences the global DNA methylation patterns  
303 and genome stability.

304 Previous studies from others and us demonstrated that DNMT1 assumes  
305 autoinhibitory conformations either in the DNA-free state (10, 11) or in the presence of  
306 unmethylated CpG DNA (8), in which the autoinhibitory linker located between the  
307 CXXC and BAH1 domains serves as a key inhibition-enforcing element in both  
308 regulations (8, 10). This study reveals that the recognition between the RFTS domain  
309 and H3K9me3 strengthens the RFTS interaction with histone H3 tails that carry either  
310 one- or two-mono-ubiquitin mark, directly contributing to the relief of the autoinhibition of  
311 DNMT1. The specific recognition of H3K9me3 by the RFTS domains of DNMT1  
312 presumably helps transduce the H3K9me3 signal into DNA methylation, thereby  
313 ensuring the epigenetic fidelity of DNA methylation in heterochromatin domains.



314 DNMT1-mediated maintenance DNA methylation is subjected to a cell cycle-  
315 dependent regulation by multiple chromatin regulators, such as UHRF1 (22, 23, 42, 43),  
316 Ubiquitin specific protease 7 (USP7) (36, 42-45), PCNA (46, 47) and PAF15 (29, 30).  
317 The RFTS-H3K9me3 interaction reinforces the previously identified UHRF1-H3K9me3  
318 axis on chromatin targeting of DNMT1. UHRF1 harbors a tandem TUDOR domain that  
319 recognizes H3K9me3 (48-53) and a RING finger domain that mediates H3 ubiquitylation  
320 for DNMT1 targeting (25, 26, 28), thereby serving as a platform for the functional  
321 crosstalk between H3K9me3 and DNA methylation (54). However, disruption of the  
322 interaction between H3K9me3 and UHRF1 via the TUDOR domain mutation only leads  
323 to a modest (~10%) reduction of DNA methylation. In this regard, the direct readout of  
324 H3K9me3Ub by the RFTS domain of DNMT1 provides a potentially redundant  
325 mechanism in transducing H3K9me3 into maintenance DNA methylation. Note that the  
326 RFTS-H3K9me3Ub readout does not involve the discrimination of the methylation  
327 state of DNA substrates, therefore providing a mechanism in supporting the region-  
328 specific methylation maintenance by DNMT1, as opposed to site-specific methylation  
329 maintenance (55, 56). Consistently, impairment of this interaction in cells compromises  
330 the DNMT1-mediated CpG methylation, leading to an aberrant landscape of DNA  
331 methylation and defects in maintenance of genome stability. It remains to be determined  
332 whether the DNMT1 mutations introduced in this study also affect the interaction of  
333 DNMT1 with other regulatory factors, such as PAF15. This targeting-coupled allosteric  
334 stimulation mechanism is reminiscent of the role of histone H3K4me0 in DNMT3A-  
335 mediated *de novo* DNA methylation, in which the specific recognition of the DNMT3A  
336 ADD domain with H3K4me0 allosterically stimulates its enzymatic activity, thereby  
337 providing a mechanism of locus-specific DNA methylation establishment (57).

338 The DNMT1 RFTS domain adds to the reader modules that offer interpretation of  
339 specific histone modifications (34), but deviates from the typical Kme3 readout that  
340 depends on aromatic or other hydrophobic residues (34): the RFTS domain presents a  
341 single tryptophan to stack against H3K9me3, unlike the typical Kme3 readout involving  
342 a hydrophobic cage composed of multiple aromatic residues (34). These observations  
343 highlight the evolutionary divergence of the histone modification-binding mechanisms.

344

## 345 **Materials and Methods**

### 346 **Plasmids**

347 The plasmid that contains DNMT1 was purchased from Addgene (cat # 24952). The  
348 DNMT1 cDNA was fused to an N-terminal 3xFlag tag by PCR, followed by subcloning  
349 into the pPyCAGIP vector (58) (kind gift of I. Chambers). DNMT1 point mutation was  
350 generated by a QuikChange II XL Site-Directed Mutagenesis Kit (Agilent), with the  
351 residue numerations based on the isoform 1 of DNMT1 that contains 1616 amino acids.  
352 For domain analysis of the DNMT1 RFTS-H3K9me3 interactions, DNA encoding the  
353 human DNMT1 RFTS domain (residues 351-597, hDNMT1<sub>RFTS</sub>) or the bovine DNMT1  
354 RFTS domain (residues 349-594, bDNMT1<sub>RFTS</sub>) was cloned into a modified pRSF-Duet  
355 vector preceded by an N-terminal His<sub>6</sub>-SUMO tag and ULP1 (ubiquitin-like protease 1)  
356 cleavage site. For analysis of hDNMT1<sub>351-1600</sub> methylation activity, the hDNMT1

357 construct was inserted into an in-house expression vector as a His<sub>6</sub>-MBP-tagged form.  
358 All plasmid sequences were verified by sequencing before use.

### 359 **Protein purification**

360 The plasmids were transformed into BL21(DE3) RIL cells (Novagen Inc). When the cell  
361 density reached an optical density at 600 nm (OD<sub>600</sub>) of 0.6, the protein expression was  
362 induced by 0.1 mM isopropyl β-D-1-thiogalactopyranoside (IPTG) at 16 °C overnight.  
363 The cells were harvested, and subsequently resuspended and lysed in a buffer  
364 containing 50 mM Tris-HCl (pH 7.5), 25 mM imidazole, 1 M NaCl, 0.5 mM DTT and 1  
365 mM PMSF. The His<sub>6</sub>-SUMO-tagged hDNMT1<sub>RFTS</sub> and bDNMT1<sub>RFTS</sub> proteins were first  
366 purified using a nickel column with elution buffer containing 25 mM Tris-HCl (pH 8.0),  
367 100 mM NaCl and 300 mM imidazole. The eluted protein was incubated with ULP1 on  
368 ice for cleavage of the His<sub>6</sub>-SUMO tag, followed by purification of the tag-free protein by  
369 anion exchange chromatography on a HiTrap Q XL column (GE Healthcare) and nickel  
370 affinity chromatography. The protein sample was finally purified on size-exclusion  
371 chromatography on a HiLoad 16/600 Superdex 75 pg column (GE Healthcare), pre-  
372 equilibrated with buffer (20 mM Tris, pH 7.5, 50 mM NaCl, 5 mM DTT). The His<sub>6</sub>-MBP  
373 tagged DNMT1 proteins were first purified by Ni<sup>2+</sup> chromatography, followed by ion-  
374 exchange chromatography on a Heparin HP (GE Healthcare) or Q HP column (GE  
375 Healthcare), removal of His<sub>6</sub>-MBP tag by TEV protease cleavage, a second round of  
376 nickel affinity chromatography, and size-exclusion chromatography on a Superdex 200  
377 16/600 column (GE Healthcare). DNMT1 mutants were introduced by site-directed  
378 mutagenesis and purified as that described for wild-type protein. All purified protein  
379 samples were stored at -80 °C before use.

### 380 **Chemical modifications of histones**

381 To prepare the ubiquitylated histones, the His<sub>6</sub>-SUMO-Ub(G76C) and each  
382 synthesized histone peptide (H3<sub>1-25</sub>K18C, H3<sub>1-25</sub>K9me3K18C, H3<sub>1-24</sub>K18CK23C or H3<sub>1-  
383 24</sub>K9me3K18CK23C, each containing an additional tryptophan at the C-terminus),  
384 dissolved in buffer (250 mM Tris-HCl (pH 8.6), 8 M urea, 5 mM TCEP), were mixed in a  
385 4:1 molar ratio, and incubated at room temperature for 30 min. The crosslinker 1,3-  
386 dichloroacetone, dissolved in N,N'-dimethylformamide, was added to the reaction  
387 mixture with the amount equal to one-half of the total sulfhydryl groups. After 2 hr.-  
388 incubation on ice, the reaction was stopped by 5 mM β-ME. Purification of H3<sub>1-25</sub>K18Ub,  
389 H3<sub>1-25</sub>K9me3K18Ub, H3<sub>1-24</sub>Ub2 and H3<sub>1-24</sub>K9me3Ub2 were achieved through cation-  
390 exchange chromatography on a mono S column (GE Healthcare).

### 391 **Crystallization and structure determination**

392 To crystallize the bDNMT1<sub>RFTS</sub>-H3K9me3-Ub2 complex, bDNMT1<sub>RFTS</sub> was mixed with  
393 H3<sub>1-24</sub>K9me3K18CK23C peptide, containing an additional tryptophan at the C-terminus,  
394 and ubiquitin in a 1:1:2 molar ratio. The complex was incubated on ice for 30 min before  
395 crystallization. The crystals were generated in a buffer containing 0.1 M citric acid (pH  
396 3.5), 28% PEG8000 at 4 °C, using the hanging-drop vapor diffusion method. The  
397 crystals were soaked in the crystallization buffer supplemented with 20-25% (v/v)  
398 glycerol as cryo-protectant before flash frozen in liquid nitrogen. The X-ray diffraction  
399 data were collected on the beamline BL5.0.1 at Advanced Light Source (ALS),  
400 Lawrence Berkeley National Laboratory. The data were indexed, integrated and scaled

401 by HKL2000 program (59) or XDS(60). The structure was solved by molecular  
402 replacement using PHASER(61) with the RFTS domain in the DNMT1 structure (PDB  
403 4WXX) as searching model. Iterative cycles of model rebuilding and refinement were  
404 carried out using COOT (62) and PHENIX (63), respectively. Data collection and  
405 structure refinement statistics were summarized in Table S2.

#### 406 **ITC binding assay**

407 ITC measurements were performed using a MicroCal iTC200 instrument (GE  
408 Healthcare). Synthesized H3<sub>1-22</sub>, H3<sub>1-22</sub>K9me3, H3<sub>1-22</sub>K9Ac, H3<sub>1-15</sub>K4me3, H3<sub>21-  
409 33</sub>K27me3, H3<sub>31-43</sub>K36me3 and H4<sub>14-25</sub>K20me3 peptides each contain a C-terminal  
410 tyrosine for spectroscopic measurement. To measure the bindings between  
411 hDNMT1<sub>RFTS</sub> and the peptides, 1 mM peptide was titrated with 0.1 mM hDNMT1<sub>RFTS</sub> at  
412 20 °C. To measure the bindings between hDNMT1<sub>351-1600</sub> and H3Ub2 or H3K9me3Ub2  
413 peptides, 0.12 mM peptide was titrated with 12 μM hDNMT1<sub>351-1600</sub> sample at 5 °C. Prior  
414 to the titration, both peptide and protein samples were subjected to overnight dialysis  
415 against buffer containing 20 mM Tris-HCl (pH 7.5), 100 mM NaCl and 1 mM DTT. Buffer  
416 to buffer titration was performed to ensure no abnormality of base line. Analyses of all  
417 data were performed with MicroCal Origin software, fitted with single-site binding mode.  
418 The ITC parameters were summarized in Table S1.

#### 419 **DNA methylation kinetics assay**

420 The DNA methylation assays were performed as previously described (8) with  
421 modifications. Synthesized H3<sub>1-25</sub>, H3<sub>1-25</sub>K9me3, H3<sub>1-25</sub>K18Ub, H3<sub>1-25</sub>K9me3K18Ub,  
422 H3<sub>1-24</sub>Ub2 and H3<sub>1-24</sub>K9me3Ub2 peptides, each with a C-terminal tryptophan, were  
423 used for evaluation of the RFTS-mediated enzymatic stimulation of hDNMT1<sub>351-1600</sub>.  
424 Each reaction mixture contains 0.1 μM hDNMT1<sub>351-1600</sub>, wild type or mutants, 0.5 mM S-  
425 adenosyl-L-[methyl<sup>3</sup>H] methionine (SAM) (Perkin Elmer), 0.4 μM (GT<sup>m</sup>C)<sub>12</sub>/(GAC)<sub>12</sub>  
426 hemimethylated DNA duplex, and various amount of histone peptides in 50 mM Tris-  
427 HCl (pH 8.0), 7 mM β-ME, 5% glycerol, 100 μg/mL BSA and 100 mM NaCl, unless  
428 indicated otherwise. The reaction mixture was incubated at 37 °C for 20 min, before  
429 quenched by 2 mM cold SAM. Eight μL of the reaction mixture was applied onto DEAE  
430 filtermat (Perkin Elmer), sequentially washed with 0.2 M ammonium bicarbonate (twice),  
431 water and ethanol. The filter paper was then air dried and soaked in ScintiVerse cocktail  
432 (Thermo fisher). The activity was measured by Beckman LS6500 scintillation counter.

#### 433 **Electrophoretic mobility shift assay**

434 To measure the H3<sub>1-24</sub>K9me3Ub2-binding affinity, 1 μM hDNMT1<sub>351-1600</sub> or hDNMT1<sub>RFTS</sub>  
435 protein was incubated with various amount of H3<sub>1-24</sub>K9me3Ub2 peptide in 10 μL binding  
436 buffer (20 mM Tris-HCl (pH 7.5), 100 mM NaCl, 1 mM DTT and 5% glycerol) at 4 °C for  
437 1 hr. The sample mixture was resolved in 4-10% native gel using 0.5X TG buffer at 4 °C  
438 under 100 V for 3.5 hr. The gel image was visualized by coomassie blue staining.

439 To measure the DNA-binding affinity of hDNMT1<sub>351-1600</sub>, 0.1 μM 26-base pair DNA duplex  
440 containing one central hemimethylated CpG site (upper strand: 5'-  
441 ACACCAAGCCTGMGGAGGCTCACGGA-3', M = 5-methylcytosine; lower strand: 5'-  
442 TCCGTGAGCCTCCGCAGGCTTGGTGT -3') was mixed with 0, 1, 2 or 5 μM  
443 hDNMT1<sub>351-1600</sub>, wild type or mutants, in the presence or absence of the H3<sub>1-</sub>

444 <sup>24</sup>K9me3Ub2 peptide, in buffer containing 20 mM Tris–HCl (pH 7.5), 50 mM NaCl, 1  
445 mM DTT and 5% glycerol at 4 °C for 1 hr, before resolved in a 6% TBE native gel. The  
446 protein-DNA complex was visualized by SYBR green staining.

#### 447 **Cell lines and tissue culture**

448 Dnmt1-knockout mouse embryonic stem cells (1KO-ESCs; a gift from Dr. M. Okano)  
449 were cultivated as previously described on gelatin-coated dishes in the base ESC  
450 culture medium supplemented with leukemia inhibitory factor(64). 1KO-ESCs were  
451 transfected by Lipofectamine 2000 (Invitrogen) with the pPyCAGIP empty vector or that  
452 carrying WT or mutant DNMT1. Forty-eight hours post-transfection, the transduced ES  
453 cells were selected out in culture medium with 1µg/mL puromycin for over two weeks.  
454 The pooled stable-expression cell lines and independent single-cell-derived clonal lines  
455 were first established, followed by further characterizations such as immunoblotting of  
456 DNMT1.

#### 457 **Antibodies and Western blotting**

458 Antibodies used for immunoblotting include α-Flag (Sigma; M2), H4K20me3 (Abcam  
459 ab9053), H3K9me3 (Abcam ab8898), general histone H3 (Abcam ab1791) and α-  
460 Tubulin (Sigma). Whole cell protein lysates were prepared by NP40 lysis buffer (50mM  
461 Tris-HCl pH 8.0, 150mM NaCl, 1% NP-40) followed by brief sonication and  
462 centrifugation. After mixing with loading buffer and boiling for 5 minutes, the same  
463 amount of extracted samples were loaded into SDS-PAGE gels for immunoblotting  
464 analysis as previously described (64, 65).

#### 465 **Quantification of 5-methyl-2'-deoxycytidine (5mC) in genomic DNA**

466 Enzymatic digestion of cellular DNA and LC-MS/MS measurements of the levels of 5-  
467 mdC in the resulting nucleoside mixture was carried out as described previously (64).

#### 468 **Confocal immunofluorescence (IF)**

469 The immunofluorescence was carried out as described before (66). In brief, 3xFlag-  
470 tagged DNMT1 transduced cells were fixed with 4% paraformaldehyde and 10-min  
471 permeabilization in 0.1% Triton X-100. After one-hour block in PBS with 2.5% of BSA,  
472 cells were stained with primary antibodies, followed by staining with the Alexa-488 or  
473 Alexa-594 conjugated secondary antibodies. The primary antibodies used include M2  
474 anti-FLAG (Sigma) and H3K9me3 (Abcam). Fluorescence was detected in a FV1000  
475 confocal microscope (UNC Imaging Core).

#### 476 **Co-immunoprecipitation (CoIP)**

477 Cells were lysed in NP40 lysis buffer that contains 50mM Tris-HCl (pH 8.0), 150mM  
478 NaCl, 1% of NP-40, 1mM DTT and a complete protease inhibitor (Roche) as described  
479 (66, 67). Antibodies H4K20me3 (Abcam ab9053), H3K9me3 (Abcam ab8898) and  
480 general histone H3 (Abcam ab1791) conjugated with protein A/G beads (Millipore) or  
481 anti-Flag M2-conjugated agarose beads (Sigma) were incubated with the lysates  
482 overnight at 4 °C. The beads were then washed 3–6 times with cell lysis buffer, and the  
483 bound proteins were eluted in SDS buffer and analyzed by western blotting.

#### 484 **Preparation of enhanced reduced representation bisulfite sequencing (eRRBS) 485 libraries**



486 Construction of eRRBS libraries was performed as described before (64). Briefly, 1  
487 microgram of total genomic DNA (gDNA) was added with 0.1% of unmethylated lambda  
488 DNA (Promega), followed by one-hour digestion with three enzymes (MspI, MseI and  
489 Bfal) at 37 degree. The purified digested gDNA was then subjected to end repair, A-  
490 tailing and ligation to NEBNext Methylated Adaptors (NEBNext DNA Library Prep Kit),  
491 followed by purification using AMPure beads. Bisulfite conversion and library  
492 construction were carried out as before using the EpiMark Bisulfite Conversion Kit (NEB  
493 cat# E3318) according to manufacturer's specifications. The generated multiplexed  
494 eRRBS libraries were subjected to deep sequencing in an Illumina HiSeq 4000 platform  
495 with a paired end PE150 cycle (carried out by UNC HTSF Genomic Core).

#### 496 **eRRBS data processing**

497 General quality control checks were performed with FastQC v0.11.2  
498 (<http://www.bioinformatics.babraham.ac.uk/projects/fastqc/>). The last 5 bases were  
499 clipped from the 3' end of every read due to questionable base quality in this region,  
500 followed by filtration of the sequences to retain only those with average base quality  
501 scores of more than 20. Examination of the 5' ends of the sequenced reads indicated  
502 that 70%-90% (average 83.0%) were consistent with exact matches to the expected  
503 restriction enzyme sites (i.e. MspI, Bfal, and MseI). Approximately 85% of both ends  
504 were consistent with the expected enzyme sites. Adapter sequence was trimmed from  
505 the 3' end of reads via Cutadapt v1.2.1 (parameters -a AGATCGGAAGAG -O 5 -q 0 -f  
506 fastq; <https://doi.org/10.14806/ej.17.1.200>). Reads less than 30nt after adapter-trimming  
507 were discarded. Filtered and trimmed datasets were aligned via Bismark v0.18.1  
508 (parameters -X 1000 --non\_bs\_mm)(68), using Bowtie v1.2(69) as the underlying  
509 alignment tool. The reference genome index contained the genome sequence of  
510 enterobacteria phage  $\lambda$  (NC\_001416.1) in addition to the mm10 reference assembly  
511 (GRCm38). For all mapped read pairs, the first 4 bases at the 5' end of read1 and the  
512 first 2 bases at the 5' end of read2 were clipped due to positional methylation bias, as  
513 determined from QC plots generated with the 'bismark\_methylation\_extractor' tool  
514 (Bismark v0.18.1). To avoid bias in quantification of methylation status, any redundant  
515 mapped bases due to overlapping read ends from the same read pair were trimmed.  
516 Read pairs in which either read end had 3 more or methylated cytosines in non-CpG  
517 context were assumed to have escaped bisulfite conversion and were discarded. Finally,  
518 mapped read pairs were separated by genome (mm10 or phage  $\lambda$ ). Read pairs mapped  
519 to phage  $\lambda$  were used as a QC assessment to confirm that the observed bisulfite  
520 conversion rate was >99%. Read pairs mapped to the mm10 reference genome were  
521 used for downstream analysis.

#### 522 **eRRBS data analysis**

523 Although the eRRBS data does carry stranded information, data from the plus and  
524 minus strands have been collapsed in this analysis. Weighted methylation scores were  
525 calculated as described by Schultz et al(70) at query regions of interest, such as  
526 H3K9me3 and H4K20me3 peaks. Depth tracks for the eRRBS data at all genomic loci  
527 were first generated in bedGraph format by BEDTools v2.24.0(71) 'genomecov', then  
528 converted to bigWig format by bedGraphToBigWig (UCSC utility script;  
529 <http://hgdownload.soe.ucsc.edu/admin/exe/>). Percent methylation tracks for the eRRBS  
530 data at CpG sites in non-cytosine context were generated by first constructing WIG



531 tracks reporting %methylation (count of methylated C bases / total C bases) per site,  
532 followed by conversion to bigWig format by wigToBigWig (UCSC utility script).

### 533 **Neutral comet assay**

534 Neutral comet assays were performed using the CometAssay Reagent Kit (Trevigen)  
535 according to the manufacturer's instruction. Cells were plated and treated with ionizing  
536 radiation (IR; 5Gy). After 2hr post-IR treatment, cells were harvested and mixed with  
537 LMAgarose (Trevigen). The mixtures were placed on glass slides (Trevigen). Cells were  
538 lysed with lysis solution (Trevigen) at 4 °C for 1h. The slides were washed with TBE  
539 (90mM Tris borate (pH 8.3) to removal of remain lysis solution and subject to  
540 electrophoresis at 40V for 40 min in TBE buffer. Samples were fixed with 70% ethanol  
541 for 10 min. The DNA was stained with SYBR-green (Invitrogen) for 15 min in RT. The  
542 images were taken by fluorescence microscopy and tail moments were calculated for at  
543 least 100 cells for each sample by Image J (v 1.48). Tail moment (TM) reflects both the  
544 tail length (TL) and the fraction of DNA in the comet tail (TM = %DNA in tail × TL/100).

### 545 **Statistics**

546 The two-tailed Student t-tests were performed to compare distributions between  
547 different groups. And the p value lower than 0.01 was considered to be statistically  
548 significant.

549 **Accession codes.** Coordinates and structure factors for the bDNMT1<sub>RFTS</sub>-H3K9me3-  
550 Ub2 complex have been deposited in the Protein Data Bank under accession codes  
551 6PZV. The eRRBS data have been deposited in Gene Expression Omnibus (GEO)  
552 under accession code GSE145698.

553

### 554 **Acknowledgments**

555 We would like to thank staff members at the Advanced Light Source (ALS), Lawrence  
556 Berkeley National Laboratory for access to X-ray beamlines. We are also grateful for  
557 professional support of UNC facilities including Genomics Core, which are partly  
558 supported by the UNC Cancer Center Core Support Grant P30-CA016086. This work  
559 was supported by NIH grants (1R35GM119721 to J.S., 5R21ES025392 to Y.W.,  
560 RO1GM079641 to O.G., 1R35GM126900 to B.D.S., 1R01CA215284 and  
561 1R01CA211336 to G.G.W., and CA198279 and CA201268 to K.M.M.), NIH T32  
562 Training Fellowship for Integrated Training in Cancer Model Systems (T32CA009156)  
563 and an American Cancer Society Postdoctoral Fellowship (PF-19-027-01-DMC) to  
564 C.J.P. and grants from When Everyone Survives (WES) Leukemia Research  
565 Foundation (to G.G. W.) and Gabrielle's Angel Foundation for Cancer Research (to  
566 G.G.W.). D.J.P. was supported by a SCOR grant by the Leukemia and Lymphoma  
567 Society and by the Memorial Sloan-Kettering Cancer Center Core Grant  
568 (P30CA008748). This work was also supported in part by the Intramural Research  
569 Program of the National Institute of Environmental Health Sciences, NIH (ES101965 to  
570 PAW). J.P.C. is supported in part by T32 CA09302. G.G.W. and K.M.M. are American  
571 Cancer Society (ACS) Research Scholar, C.J.P. is an ACS postdoctoral fellow, and  
572 G.G.W. is a Leukemia & Lymphoma Society (LLS) Scholar.

573 **Author Contributions**

574 W.R., H.F., S.A.G., Y.G., J.J.K., L.L., C.J.P., X-F. T., Z-M. Z., J.P.C, J.Y., L.G., S.L.,  
575 L.C., B.D., Y.W., Q.C., and S.O. performed experiments. Y.W., B.S., O.G., K.M.M., S.O.,  
576 P.A.W., D.J.P, G.G.W. and J.S. organized the study. D.J.P., O.G., G.G.W. and J.S.  
577 conceived the study, G.G.W. and J.S wrote the manuscript with input from all the  
578 authors.

579 **References**

- 580 1. Smith ZD & Meissner A (2013) DNA methylation: roles in mammalian development. *Nat Rev*  
581 *Genet* 14(3):204-220.
- 582 2. Walsh CP, Chaillet JR, & Bestor TH (1998) Transcription of IAP endogenous retroviruses is  
583 constrained by cytosine methylation. *Nat Genet* 20(2):116-117.
- 584 3. Li E, Beard C, & Jaenisch R (1993) Role for DNA methylation in genomic imprinting. *Nature*  
585 366(6453):362-365.
- 586 4. Panning B & Jaenisch R (1998) RNA and the epigenetic regulation of X chromosome inactivation.  
587 *Cell* 93(3):305-308.
- 588 5. Yagi S, *et al.* (2008) DNA methylation profile of tissue-dependent and differentially methylated  
589 regions (T-DMRs) in mouse promoter regions demonstrating tissue-specific gene expression.  
590 *Genome research* 18(12):1969-1978.
- 591 6. Goll MG & Bestor TH (2005) Eukaryotic cytosine methyltransferases. *Annu Rev Biochem* 74:481-  
592 514.
- 593 7. Jeltsch A (2006) On the enzymatic properties of Dnmt1: specificity, processivity, mechanism of  
594 linear diffusion and allosteric regulation of the enzyme. *Epigenetics* 1(2):63-66.
- 595 8. Song J, Rechkoblit O, Bestor TH, & Patel DJ (2011) Structure of DNMT1-DNA complex reveals a  
596 role for autoinhibition in maintenance DNA methylation. *Science* 331(6020):1036-1040.
- 597 9. Song J, Teplova M, Ishibe-Murakami S, & Patel DJ (2012) Structure-based mechanistic insights  
598 into DNMT1-mediated maintenance DNA methylation. *Science* 335(6069):709-712.
- 599 10. Takeshita K, *et al.* (2011) Structural insight into maintenance methylation by mouse DNA  
600 methyltransferase 1 (Dnmt1). *Proc Natl Acad Sci U S A* 108(22):9055-9059.
- 601 11. Zhang ZM, *et al.* (2015) Crystal Structure of Human DNA Methyltransferase 1. *J Mol Biol*  
602 427(15):2520-2531.
- 603 12. Bashtrykov P, *et al.* (2014) Targeted mutagenesis results in an activation of DNA  
604 methyltransferase 1 and confirms an autoinhibitory role of its RFTS domain. *ChemBiochem : a*  
605 *European journal of chemical biology* 15(5):743-748.
- 606 13. Berkuyrek AC, *et al.* (2014) The DNA methyltransferase Dnmt1 directly interacts with the SET  
607 and RING finger-associated (SRA) domain of the multifunctional protein Uhrf1 to facilitate  
608 accession of the catalytic center to hemi-methylated DNA. *J Biol Chem* 289(1):379-386.
- 609 14. Syeda F, *et al.* (2011) The replication focus targeting sequence (RFTS) domain is a DNA-  
610 competitive inhibitor of Dnmt1. *J Biol Chem* 286(17):15344-15351.
- 611 15. Svedruzic ZM & Reich NO (2005) Mechanism of allosteric regulation of Dnmt1's processivity.  
612 *Biochemistry* 44(45):14977-14988.
- 613 16. Yoder JA, Soman NS, Verdine GL, & Bestor TH (1997) DNA (cytosine-5)-methyltransferases in  
614 mouse cells and tissues. Studies with a mechanism-based probe. *J Mol Biol* 270(3):385-395.
- 615 17. Cheng X & Blumenthal RM (2010) Coordinated chromatin control: structural and functional  
616 linkage of DNA and histone methylation. *Biochemistry* 49(14):2999-3008.
- 617 18. Du J, Johnson LM, Jacobsen SE, & Patel DJ (2015) DNA methylation pathways and their crosstalk  
618 with histone methylation. *Nature reviews. Molecular cell biology* 16(9):519-532.

- 619 19. Du J, *et al.* (2012) Dual binding of chromomethylase domains to H3K9me2-containing  
620 nucleosomes directs DNA methylation in plants. *Cell* 151(1):167-180.
- 621 20. Freitag M, Hickey PC, Khlafallah TK, Read ND, & Selker EU (2004) HP1 is essential for DNA  
622 methylation in neurospora. *Mol Cell* 13(3):427-434.
- 623 21. Cedar H & Bergman Y (2009) Linking DNA methylation and histone modification: patterns and  
624 paradigms. *Nat Rev Genet* 10(5):295-304.
- 625 22. Bostick M, *et al.* (2007) UHRF1 plays a role in maintaining DNA methylation in mammalian cells.  
626 *Science* 317(5845):1760-1764.
- 627 23. Sharif J, *et al.* (2007) The SRA protein Np95 mediates epigenetic inheritance by recruiting Dnmt1  
628 to methylated DNA. *Nature* 450(7171):908-912.
- 629 24. Liu X, *et al.* (2013) UHRF1 targets DNMT1 for DNA methylation through cooperative binding of  
630 hemi-methylated DNA and methylated H3K9. *Nature communications* 4:1563.
- 631 25. Nishiyama A, *et al.* (2013) Uhrf1-dependent H3K23 ubiquitylation couples maintenance DNA  
632 methylation and replication. *Nature* 502(7470):249-253.
- 633 26. Qin W, *et al.* (2015) DNA methylation requires a DNMT1 ubiquitin interacting motif (UIM) and  
634 histone ubiquitination. *Cell research*.
- 635 27. Harrison JS, *et al.* (2016) Hemi-methylated DNA regulates DNA methylation inheritance through  
636 allosteric activation of H3 ubiquitylation by UHRF1. *eLife* 5.
- 637 28. Ishiyama S, *et al.* (2017) Structure of the Dnmt1 Reader Module Complexed with a Unique Two-  
638 Mono-Ubiquitin Mark on Histone H3 Reveals the Basis for DNA Methylation Maintenance. *Mol*  
639 *Cell* 68(2):350-360 e357.
- 640 29. Nishiyama A, *et al.* (2020) Two distinct modes of DNMT1 recruitment ensure stable maintenance  
641 DNA methylation. *Nature communications* 11(1):1222.
- 642 30. Gonzalez-Magana A, *et al.* (2019) Double Monoubiquitination Modifies the Molecular  
643 Recognition Properties of p15(PAF) Promoting Binding to the Reader Module of Dnmt1. *ACS*  
644 *chemical biology* 14(10):2315-2326.
- 645 31. Li T, *et al.* (2018) Structural and mechanistic insights into UHRF1-mediated DNMT1 activation in  
646 the maintenance DNA methylation. *Nucleic Acids Res* 46(6):3218-3231.
- 647 32. Fang J, *et al.* (2016) Hemi-methylated DNA opens a closed conformation of UHRF1 to facilitate  
648 its histone recognition. *Nature communications* 7:11197.
- 649 33. Morgan MT, *et al.* (2016) Structural basis for histone H2B deubiquitination by the SAGA DUB  
650 module. *Science* 351(6274):725-728.
- 651 34. Taverna SD, Li H, Ruthenburg AJ, Allis CD, & Patel DJ (2007) How chromatin-binding modules  
652 interpret histone modifications: lessons from professional pocket pickers. *Nat Struct Mol Biol*  
653 14(11):1025-1040.
- 654 35. Xi Q, *et al.* (2011) A poised chromatin platform for TGF-beta access to master regulators. *Cell*  
655 147(7):1511-1524.
- 656 36. Yamaguchi L, *et al.* (2017) Usp7-dependent histone H3 deubiquitylation regulates maintenance  
657 of DNA methylation. *Scientific reports* 7(1):55.
- 658 37. Tsumura A, *et al.* (2006) Maintenance of self-renewal ability of mouse embryonic stem cells in  
659 the absence of DNA methyltransferases Dnmt1, Dnmt3a and Dnmt3b. *Genes to cells : devoted to*  
660 *molecular & cellular mechanisms* 11(7):805-814.
- 661 38. Saksouk N, Simboeck E, & Dejardin J (2015) Constitutive heterochromatin formation and  
662 transcription in mammals. *Epigenetics & chromatin* 8:3.
- 663 39. Robertson KD (2005) DNA methylation and human disease. *Nat Rev Genet* 6(8):597-610.
- 664 40. Lehnertz B, *et al.* (2003) Suv39h-mediated histone H3 lysine 9 methylation directs DNA  
665 methylation to major satellite repeats at pericentric heterochromatin. *Curr Biol* 13(14):1192-  
666 1200.

- 667 41. Peters AH, *et al.* (2001) Loss of the Suv39h histone methyltransferases impairs mammalian  
668 heterochromatin and genome stability. *Cell* 107(3):323-337.
- 669 42. Du Z, *et al.* (2010) DNMT1 stability is regulated by proteins coordinating deubiquitination and  
670 acetylation-driven ubiquitination. *Science signaling* 3(146):ra80.
- 671 43. Qin W, Leonhardt H, & Spada F (2011) Usp7 and Uhrf1 control ubiquitination and stability of the  
672 maintenance DNA methyltransferase Dnmt1. *Journal of cellular biochemistry* 112(2):439-444.
- 673 44. Cheng J, *et al.* (2015) Molecular mechanism for USP7-mediated DNMT1 stabilization by  
674 acetylation. *Nature communications* 6:7023.
- 675 45. Felle M, *et al.* (2011) The USP7/Dnmt1 complex stimulates the DNA methylation activity of  
676 Dnmt1 and regulates the stability of UHRF1. *Nucleic Acids Res* 39(19):8355-8365.
- 677 46. Chuang LS, *et al.* (1997) Human DNA-(cytosine-5) methyltransferase-PCNA complex as a target  
678 for p21WAF1. *Science* 277(5334):1996-2000.
- 679 47. Jimenji T, Matsumura R, Kori S, & Arita K (2019) Structure of PCNA in complex with DNMT1 PIP  
680 box reveals the basis for the molecular mechanism of the interaction. *Biochemical and*  
681 *biophysical research communications* 516(2):578-583.
- 682 48. Arita K, *et al.* (2012) Recognition of modification status on a histone H3 tail by linked histone  
683 reader modules of the epigenetic regulator UHRF1. *Proc Natl Acad Sci U S A* 109(32):12950-  
684 12955.
- 685 49. Cheng J, *et al.* (2013) Structural insight into coordinated recognition of trimethylated histone H3  
686 lysine 9 (H3K9me3) by the plant homeodomain (PHD) and tandem tudor domain (TTD) of UHRF1  
687 (ubiquitin-like, containing PHD and RING finger domains, 1) protein. *J Biol Chem* 288(2):1329-  
688 1339.
- 689 50. Karagianni P, Amazit L, Qin J, & Wong J (2008) ICBP90, a novel methyl K9 H3 binding protein  
690 linking protein ubiquitination with heterochromatin formation. *Mol Cell Biol* 28(2):705-717.
- 691 51. Rothbart SB, *et al.* (2013) Multivalent histone engagement by the linked tandem Tudor and PHD  
692 domains of UHRF1 is required for the epigenetic inheritance of DNA methylation. *Genes Dev*  
693 27(11):1288-1298.
- 694 52. Rothbart SB, *et al.* (2012) Association of UHRF1 with methylated H3K9 directs the maintenance  
695 of DNA methylation. *Nat Struct Mol Biol* 19(11):1155-1160.
- 696 53. Xie S, Jakoncic J, & Qian C (2012) UHRF1 double tudor domain and the adjacent PHD finger act  
697 together to recognize K9me3-containing histone H3 tail. *J Mol Biol* 415(2):318-328.
- 698 54. Hashimoto H, Horton JR, Zhang X, & Cheng X (2009) UHRF1, a modular multi-domain protein,  
699 regulates replication-coupled crosstalk between DNA methylation and histone modifications.  
700 *Epigenetics* 4(1):8-14.
- 701 55. Jones PA & Liang G (2009) Rethinking how DNA methylation patterns are maintained. *Nat Rev*  
702 *Genet* 10(11):805-811.
- 703 56. Jurkowska RZ, Jurkowski TP, & Jeltsch A (2011) Structure and function of mammalian DNA  
704 methyltransferases. *ChemBiochem : a European journal of chemical biology* 12(2):206-222.
- 705 57. Guo X, *et al.* (2014) Structural insight into autoinhibition and histone H3-induced activation of  
706 DNMT3A. *Nature*.
- 707 58. Chambers I, *et al.* (2003) Functional expression cloning of Nanog, a pluripotency sustaining  
708 factor in embryonic stem cells. *Cell* 113(5):643-655.
- 709 59. Otwinowski Z & Minor W (1997) Processing of X-ray diffraction data collected in oscillation  
710 mode. *Methods in enzymology* 276:307-326.
- 711 60. Kabsch W (2010) Xds. *Acta Crystallogr D Biol Crystallogr* 66(Pt 2):125-132.
- 712 61. McCoy AJ, *et al.* (2007) Phaser crystallographic software. *J Appl Crystallogr* 40(Pt 4):658-674.
- 713 62. Emsley P & Cowtan K (2004) Coot: model-building tools for molecular graphics. *Acta Crystallogr*  
714 *D Biol Crystallogr* 60(Pt 12 Pt 1):2126-2132.



- 715 63. Adams PD, *et al.* (2002) PHENIX: building new software for automated crystallographic structure  
716 determination. *Acta Crystallogr D Biol Crystallogr* 58(Pt 11):1948-1954.
- 717 64. Zhang ZM, *et al.* (2018) Structural basis for DNMT3A-mediated de novo DNA methylation.  
718 *Nature* 554(7692):387-391.
- 719 65. Lu R, *et al.* (2016) Epigenetic Perturbations by Arg882-Mutated DNMT3A Potentiate Aberrant  
720 Stem Cell Gene-Expression Program and Acute Leukemia Development. *Cancer Cell* 30(1):92-107.
- 721 66. Cai L, *et al.* (2013) An H3K36 Methylation-Engaging Tudor Motif of Polycomb-like Proteins  
722 Mediates PRC2 Complex Targeting. *Mol Cell* 49(3):571-582.
- 723 67. Xu B, *et al.* (2015) Selective inhibition of EZH2 and EZH1 enzymatic activity by a small molecule  
724 suppresses MLL-rearranged leukemia. *Blood* 125(2):346-357.
- 725 68. Krueger F & Andrews SR (2011) Bismark: a flexible aligner and methylation caller for Bisulfite-  
726 Seq applications. *Bioinformatics* 27(11):1571-1572.
- 727 69. Langmead B, Trapnell C, Pop M, & Salzberg SL (2009) Ultrafast and memory-efficient alignment  
728 of short DNA sequences to the human genome. *Genome biology* 10(3):R25.
- 729 70. Schultz MD, Schmitz RJ, & Ecker JR (2012) 'Leveling' the playing field for analyses of single-base  
730 resolution DNA methylomes. *Trends in genetics : TIG* 28(12):583-585.
- 731 71. Quinlan AR & Hall IM (2010) BEDTools: a flexible suite of utilities for comparing genomic  
732 features. *Bioinformatics* 26(6):841-842.

733

## 734 **Figure legends**

### 735 **Figure 1. Specific interaction between the DNMT1 RFTS domain and H3K9me3Ub.**

736 (A) Domain architecture of human DNMT1 (hDNMT1), with individual domains delimited  
737 by residues numbers. (B,C) ITC binding assays of hDNMT1<sub>RFTS</sub> over H3<sub>1-22</sub> (B) and  
738 H3<sub>1-22</sub>K9m3 (C) peptides. (D,E) ITC binding assays of hDNMT1<sub>351-1600</sub> over H3<sub>1-</sub>  
739 <sub>24</sub>K9me3Ub2 (D) and H3<sub>1-24</sub>Ub2 (E) peptides. (F) *In vitro* DNA methylation assays for  
740 hDNMT1<sub>351-1600</sub> in the absence or presence of H3 peptides with the indicated  
741 modification. Mean and s.d. were derived from three independent measurements. n.s.,  
742 not significant; \*\* $p < 0.01$ ; \*\*\* $p < 0.001$ .

### 743 **Figure 2. Structural details for the bDNMT1<sub>RFTS</sub> domain in complex with 744 H3K9me3K18C/K23C and ubiquitin.**

745 (A) Crystal structure of bovine DNMT1<sub>RFTS</sub> (light green) in complex with H3<sub>1-</sub>  
746 <sub>24</sub>K9me3/K18C/K23C peptide (yellow) and G76C-mutated ubiquitin (magenta and  
747 salmon). The zinc ions are shown as purple spheres. (B) Crystal structure of bovine  
748 DNMT1<sub>RFTS</sub> (light green) in complex with H3<sub>1-24</sub>K9me3/K18C/K23C peptide (yellow) and  
749 G76C-mutated ubiquitin (purple and salmon). The Fo-Fc omit map (blue) of the H3  
750 peptide was contoured at the 1.5  $\sigma$  level. (C) Close-up views of the intermolecular  
751 interactions between bDNMT1 RFTS (light green) and the H3<sub>1-24</sub>K9me3K18CK23C  
752 peptide (yellow stick). The two ubiquitin molecules are colored in salmon and magenta,  
753 respectively. Hydrogen bonds are shown as dashed lines. The zinc ion is shown as  
754 purple sphere. (D,E) Close-up views of the intermolecular interactions between the  
755 conserved I44 patch of two ubiquitin molecules (magenta and salmon) and bDNMT1  
756 RFTS (light green). (F) Close-up views of the intermolecular interactions between URL  
757 of bDNMT1 RFTS (light green) and two ubiquitin molecules (magenta and salmon). (G)



758 Close-up views of the close proximity between the H3<sub>1-24</sub>K9me3K18CK23C peptide  
759 (yellow stick) and the ubiquitin molecules (salmon and magenta).

760 **Figure 3. Biochemical and cellular analysis of the RFTS-H3K9me3Ub2 interaction.**

761 (A) Close-up view of the residues forming the H3K9me3-binding pocket, in the same  
762 color scheme as in Fig. 2. For clarity, the side chains of ubiquitin R72 and R74 are not  
763 shown. (B) EMSA analysis of the interaction between hDNMT1<sub>351-597</sub>, either wild type  
764 (WT), W465A or W464A/W465A, and the H3<sub>1-24</sub>K9me3Ub2 peptide. (C) EMSA analysis  
765 of the interaction between hDNMT1<sub>351-1600</sub>, either wild type (WT), W465A or  
766 W464A/W465A, and the H3<sub>1-24</sub>K9me3Ub2 peptide. (D,E) ITC binding assays of  
767 hDNMT1<sub>RFTS</sub> W465A mutant over H3<sub>1-22</sub>K9m3 (D) and H3<sub>1-22</sub> (E) peptides. (F) ITC  
768 binding assays of hDNMT1<sub>RFTS</sub> W464A/W465A mutant over H3<sub>1-22</sub>K9me3 peptide. (G)  
769 Immunoblots of the indicated Flag-tagged DNMT1 after stable reconstitution into the  
770 independently derived 1KO-ESC lines. (H) CoIP (upper panels) detecting association of  
771 the indicated Flag-tagged DNMT1 with H3K9me3 or H4K20me3. Bottom panels are  
772 immunoblots of input. (I) DNA methylation activities of hDNMT1<sub>351-1600</sub>, either WT,  
773 W465A or W464A/W465A, in the absence of presence of H3<sub>1-24</sub>K9me3Ub2 peptide.  
774 Mean and s.d. were derived from three independent measurements. (\*\*,  $p < 0.01$ , \*\*\*,  
775  $p < 0.001$ , n.s. not significant, Student's *t*-test) (J) Representative confocal  
776 immunofluorescence images revealing localization of the indicated DNMT1 (Flag-  
777 tagged, red), H3K9me3 (green) and chromatin (stained by DAPI, blue) in the 1KO-ESC  
778 stable expression lines synchronized at S phase. Scale bar, 5 micrometers.

779 **Figure 4. The role of RFTS mutant in cellular CpG methylation pattern and IR**  
780 **response.**

781 (A) LC-MS analysis of global 5-methyl-2-deoxycytidine (5-mdC) levels (calculated as 5-  
782 mdC/2-deoxyguanosine on the y-axis) in 1KO-ESC lines after stable transduction of  
783 empty vector or the indicated DNMT1 ( $n = 3-6$  biological replicates). Data are mean  $\pm$   
784 s.d. (B) Bar plots showing the CpG methylation levels in 1KO-ESC lines with stable  
785 expression of the indicated DNMT1. (C) Box plot shows weighted methylation levels of  
786 CpGs located within H3K9me3 peaks in 1KO-ESC lines with stable expression of the  
787 indicated DNMT1. Scores are calculated after aggregating data from three replicated  
788 samples per group. Only H3K9me3 peaks with the mapped reads are included ( $n =$   
789 103,603 for WT, 101,791 for W465, and 102,892 for W464A/W465A). In the plot, the  
790 box depicts the 25th to 75th percentiles, with the band in the box representing the  
791 median. (D) Representative IGV view shows CpG methylation at an H3K9me3-marked  
792 genomic region located in the chromosome X among three replicated 1KO-ESC lines  
793 with stable expression of the indicated DNMT1. Cytosines covered by at least 5 reads  
794 according to eRRBS data are shown, with each site designated by a vertical line. (E,F)  
795 Neutral comet assays revealing DNA breaks (DNA breaks quantified in panel F) after  
796 ionizing radiation (IR) treatment of 1KO-ESC cells reconstituted with vector control or  
797 the indicated DNMT1. Box-and whisker plots in panel F depict 25-75% in the box,  
798 whiskers are 10-90%, and median is indicated. Data represent the mean  $\pm$  S.E.M.  
799 from  $>100$  cells ( $N = 3$  biologically independent replicates).

**Figure 1**

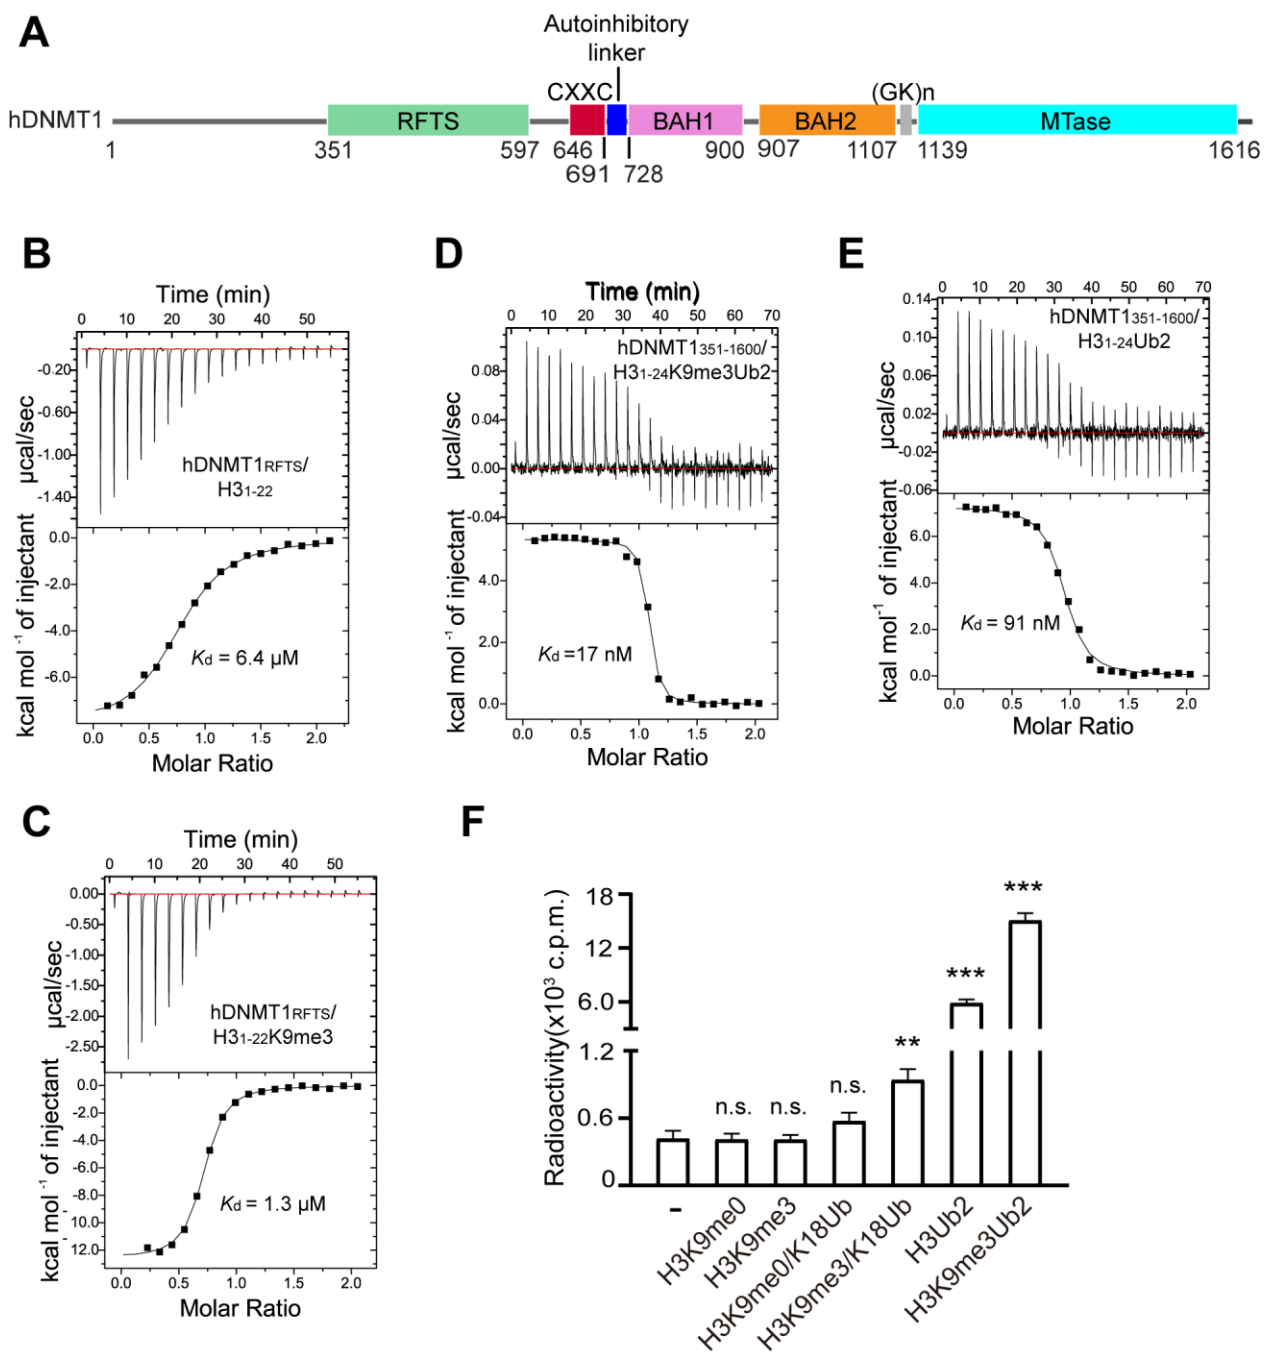

**Figure 2**

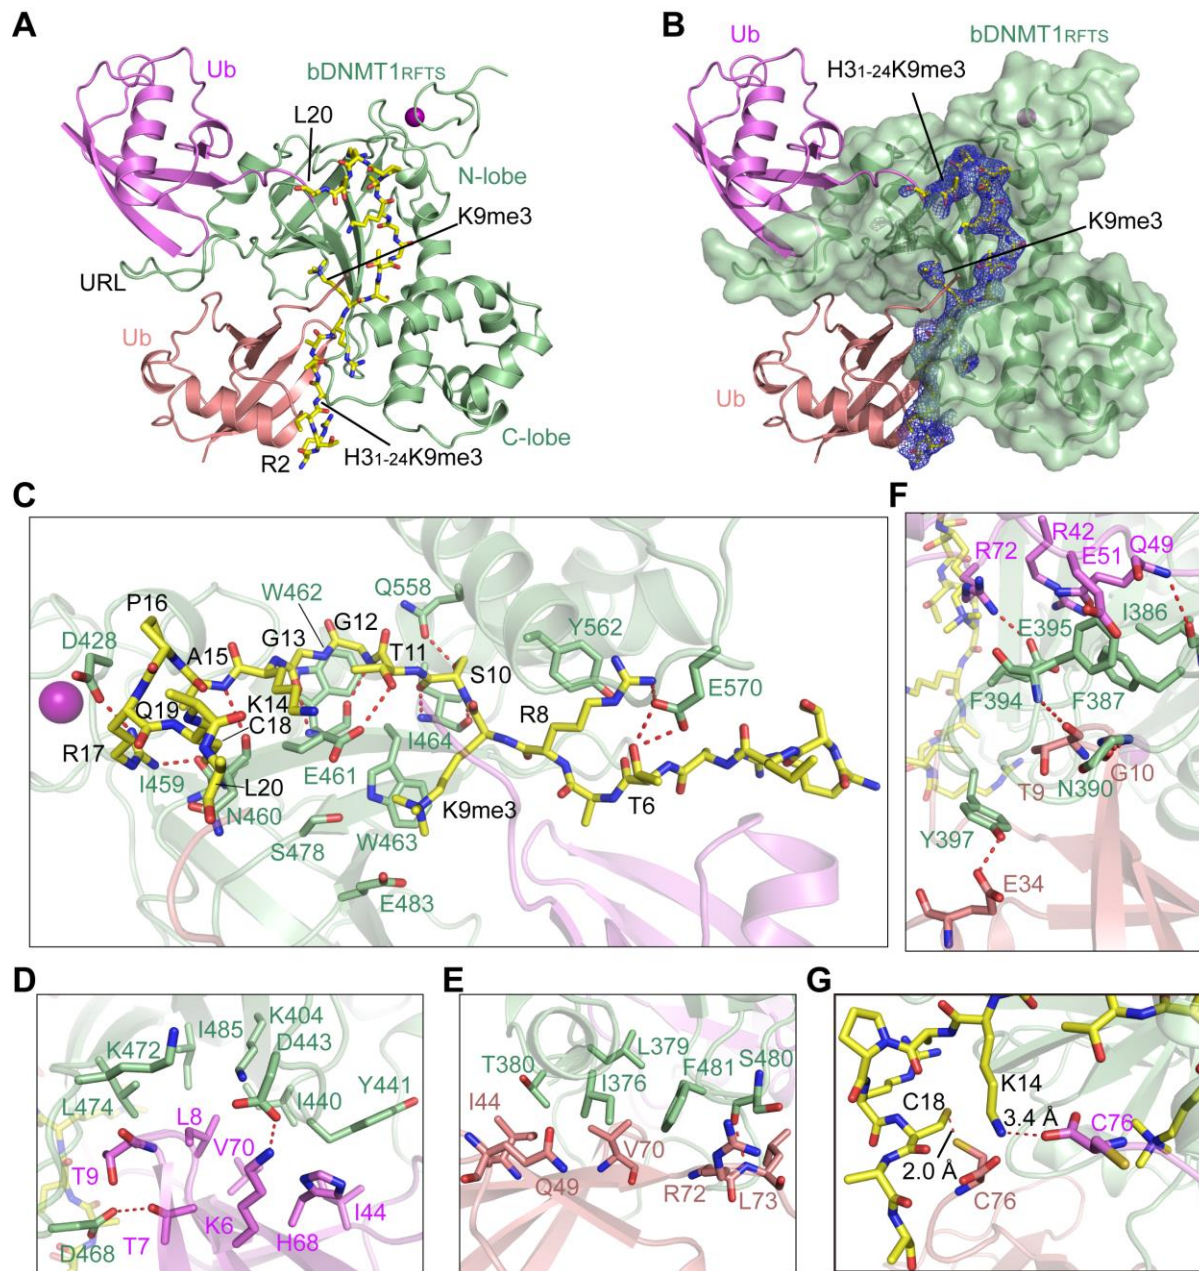



**Figure 3**

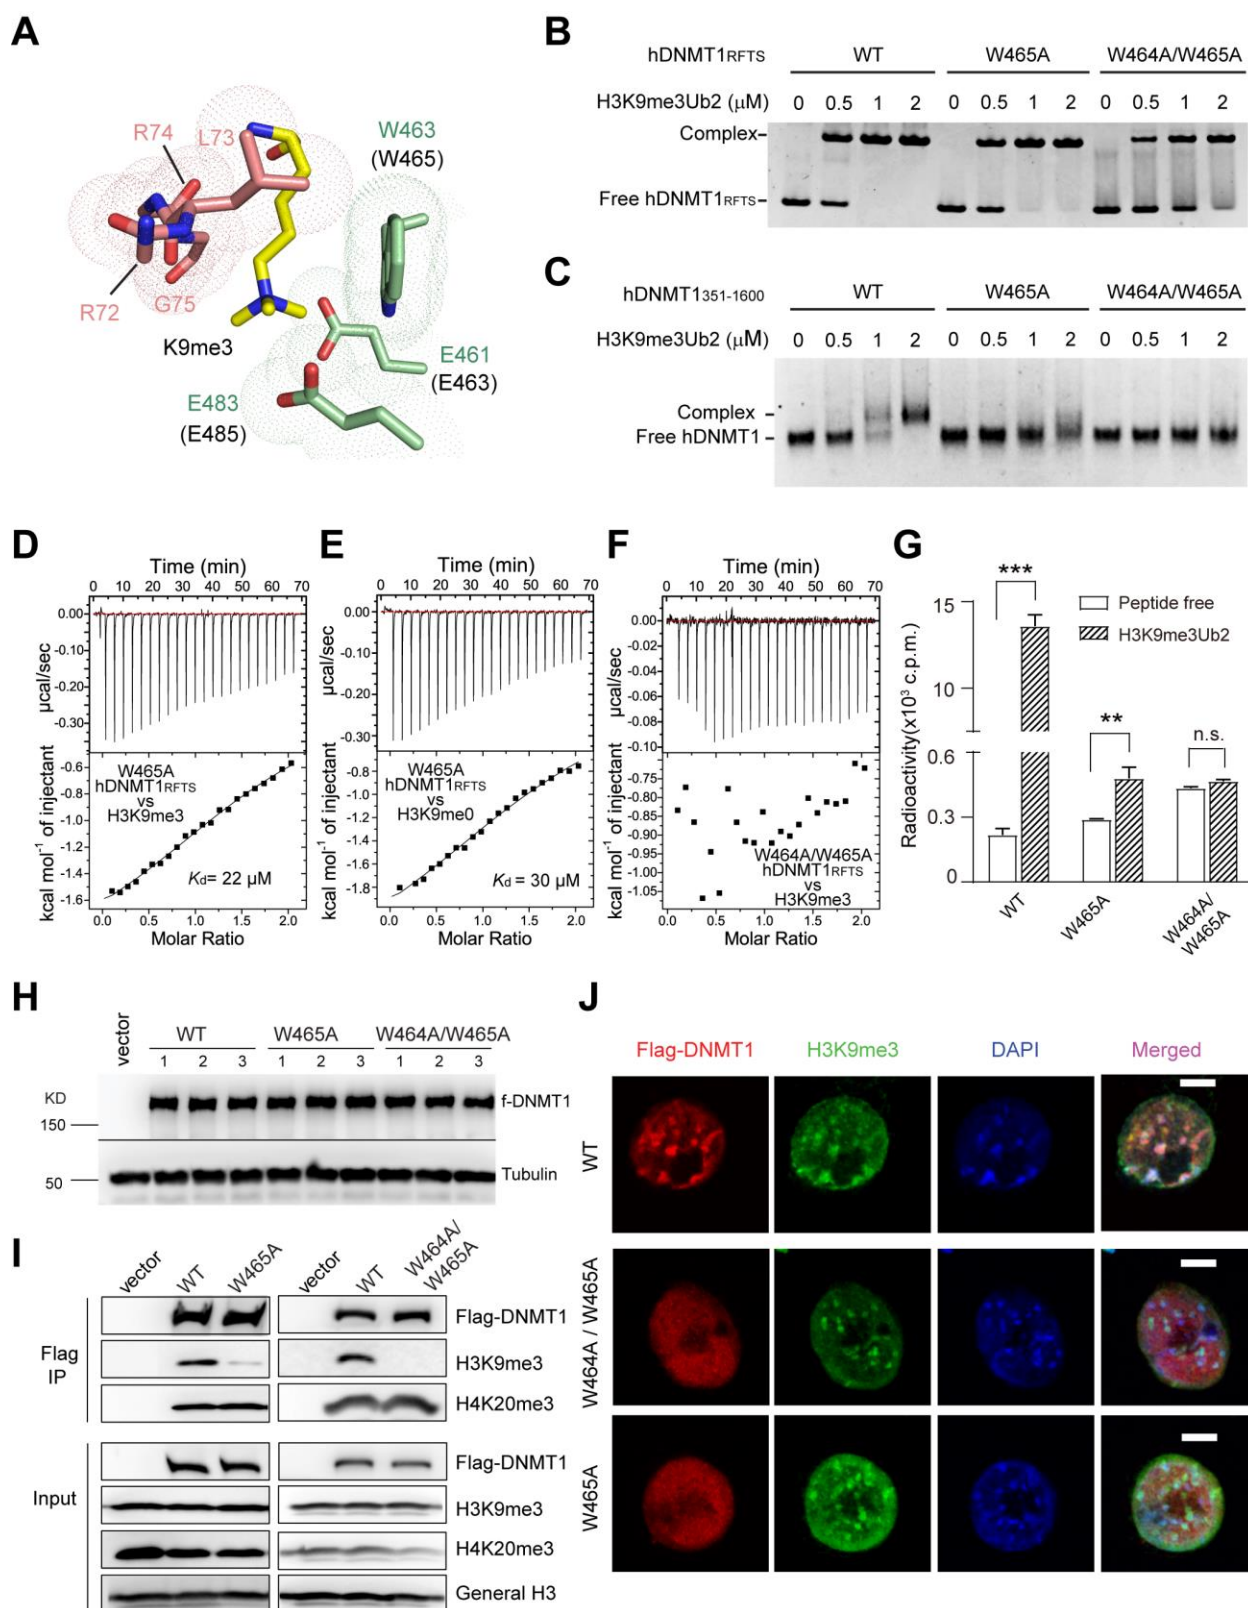

**Figure 4**

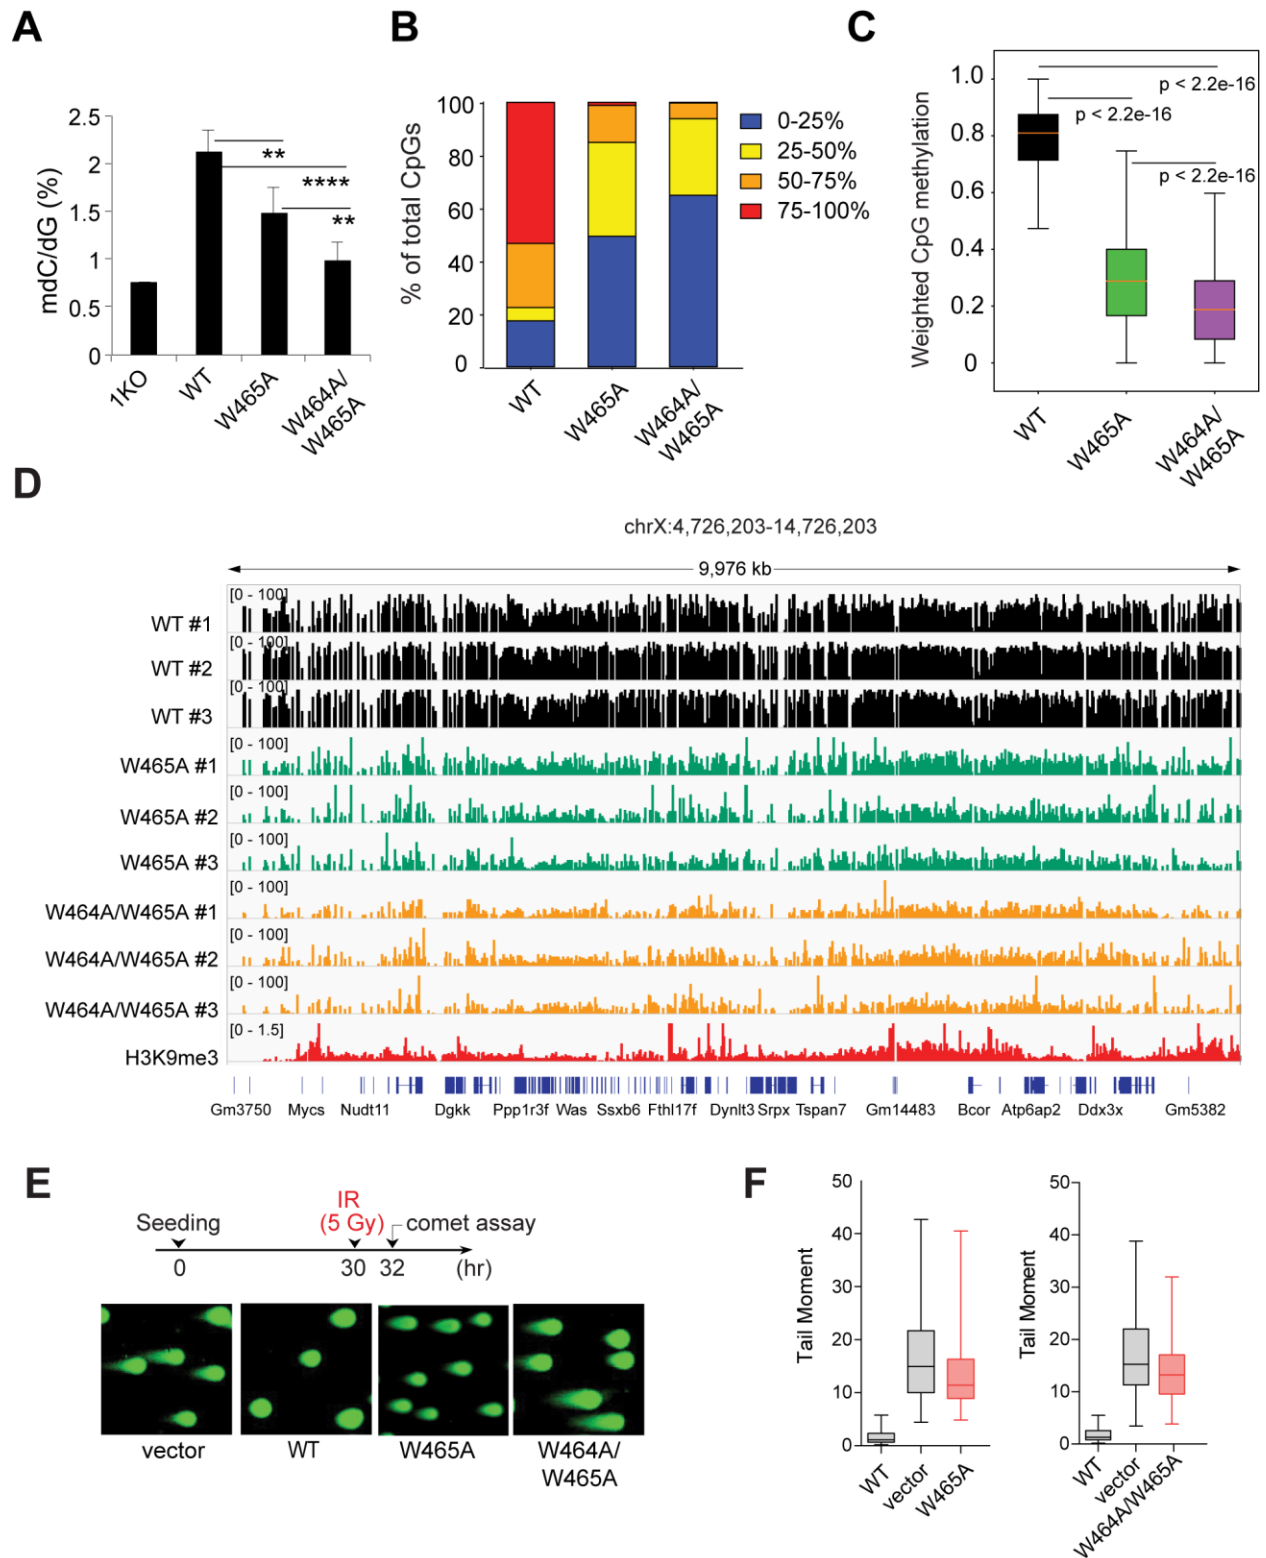



## Supplementary Information for

### **Direct readout of heterochromatic H3K9me3 regulates DNMT1-mediated maintenance DNA methylation**

Wendan Ren, Huitao Fan, Sara A Grimm, Yiran Guo, Jae Jin Kim, Linhui Li, Christopher James Petell, Xiao-Feng Tan, Zhi-Min Zhang, John P. Coan, Jiekai Yin, Linfeng Gao, Ling Cai Brittany Detrick, Burak Çetin, Yinsheng Wang, Qiang Cui, Brian D. Strahl, Or Gozani, Kyle M. Miller, Seán E. O'Leary, Paul A. Wade, Dinshaw J. Patel, Gang Greg Wang, Jikui Song

Correspondence: [pateld@mskcc.org](mailto:pateld@mskcc.org); [greg\\_wang@med.unc.edu](mailto:greg_wang@med.unc.edu); [jikui.song@ucr.edu](mailto:jikui.song@ucr.edu)

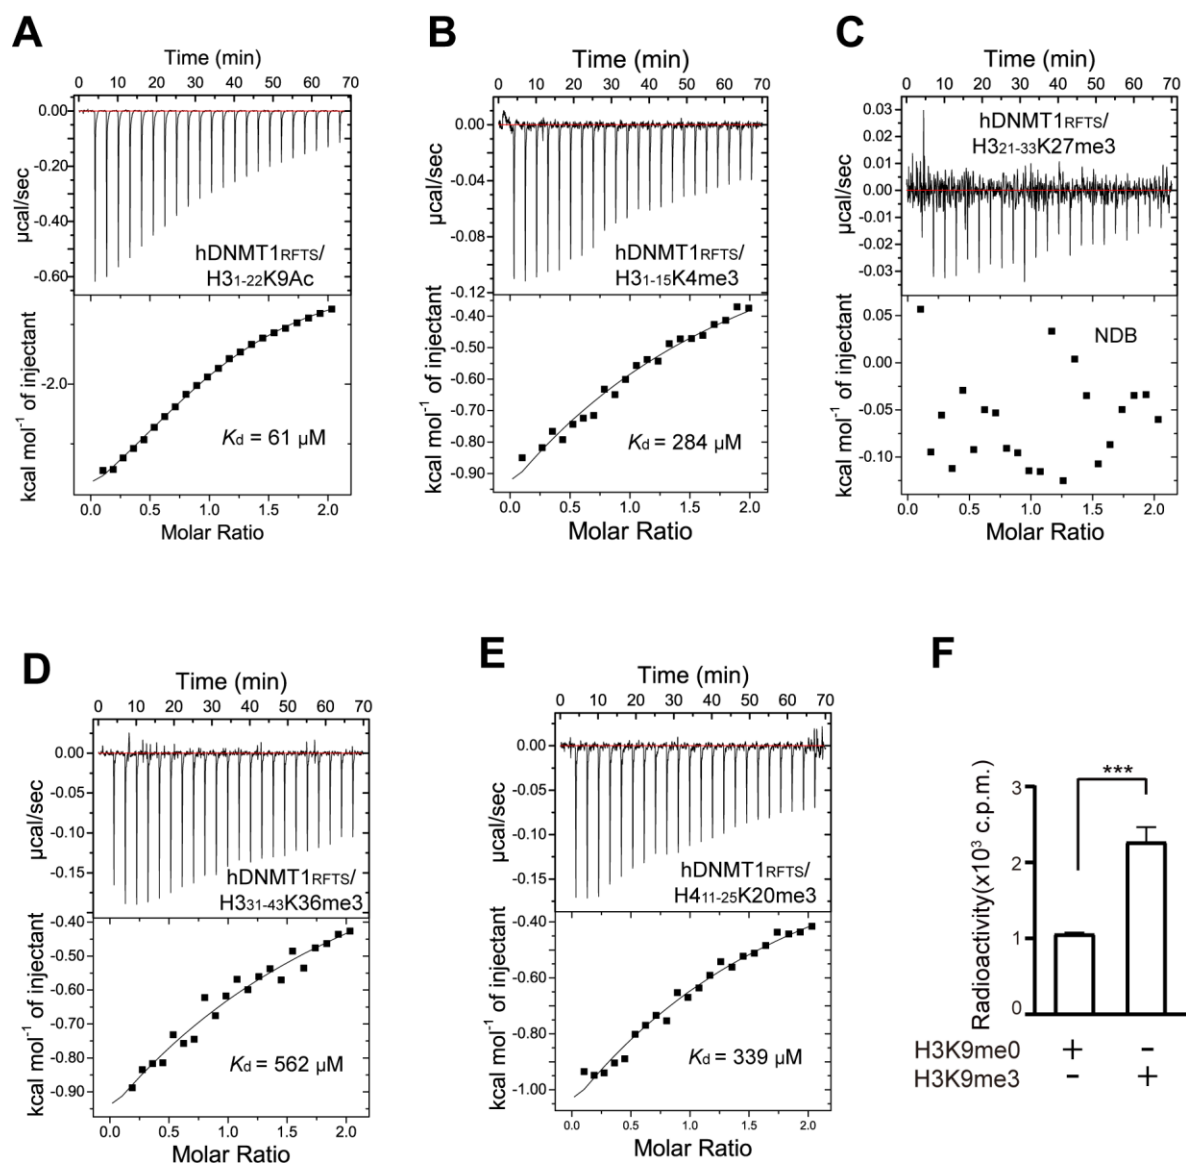

**Figure S1. Biochemical analysis of the interaction between DNMT1 RFTS domain and histone peptides.**

(A-E) ITC binding curves of hDNMT1<sub>RFTS</sub> with the H3<sub>1-22</sub>K9Ac peptide (A), H3<sub>1-15</sub>K4me3 peptide (B), H3<sub>21-33</sub>K27me3 peptide (C), H3<sub>31-43</sub>K36me3 peptide (D) and H4<sub>11-25</sub>K20me3 peptide (E). (F) DNA methylation activity of hDNMT1<sub>351-1600</sub> in the presence of 100-fold molar excess of H3K9me0 or H3K9me3 peptides. Mean and s.d. were derived from three independent measurements. (\*\*\*,  $p < 0.001$ , Student's *t*-test).

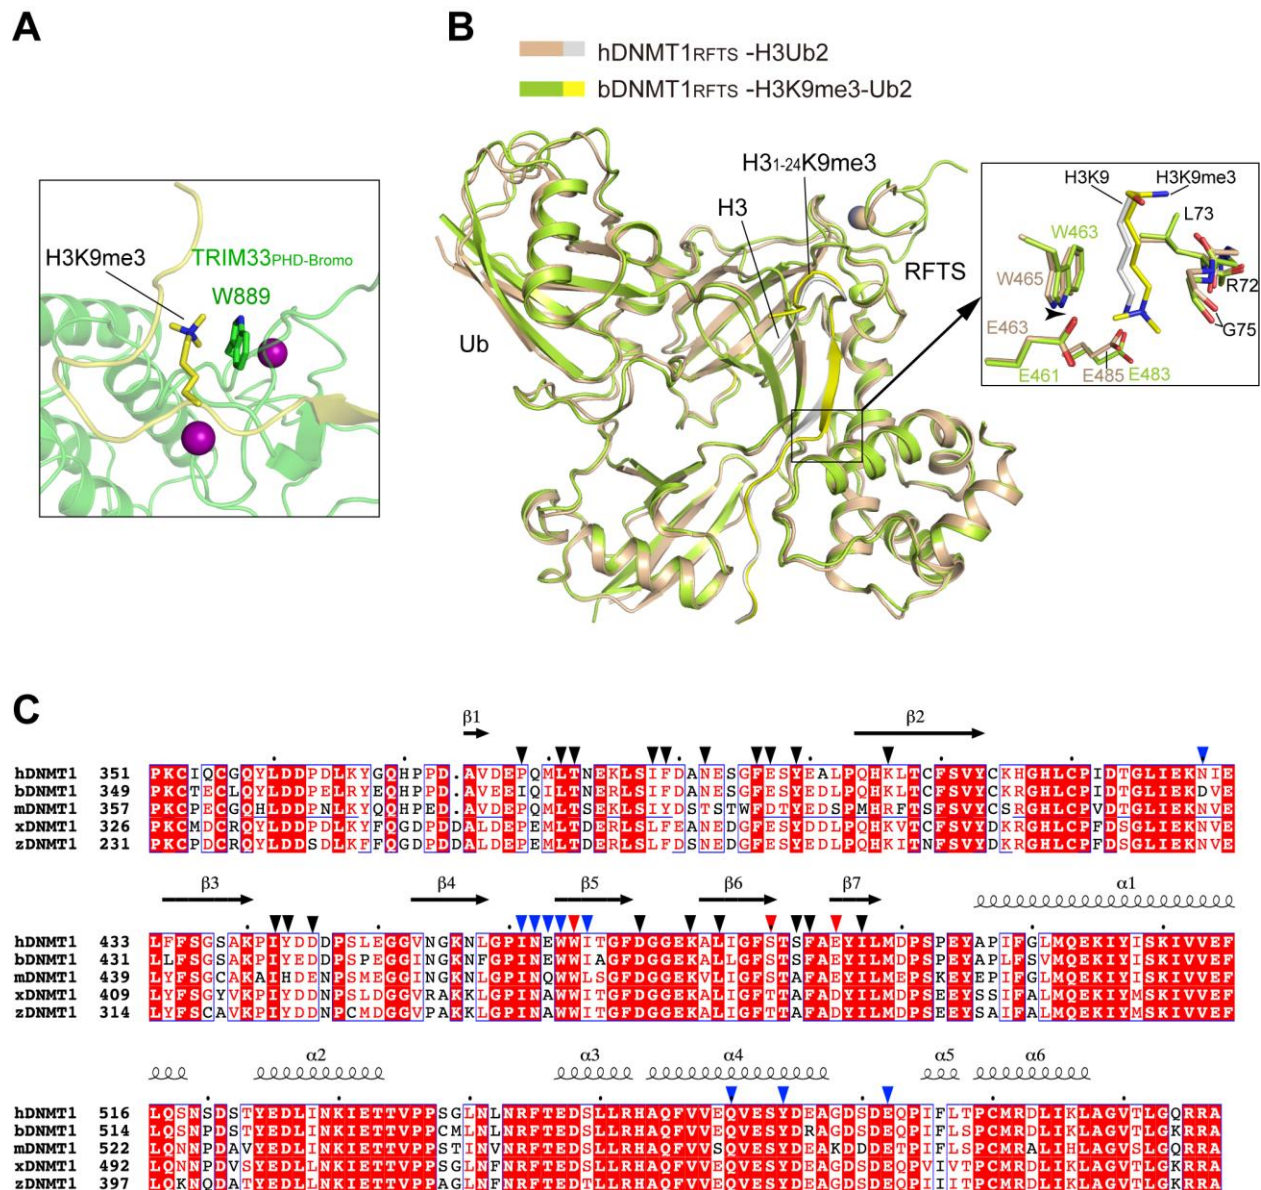

**Figure S2. Structural analysis of the H3K9me3-binding pocket.**

(A) Close-up view of the interaction between the residue W889 of the TRIM33 PHD domain and H3K9me3 (PDB 3U5N). (B) Structural superposition of bDNMT1<sub>RFTS</sub>-H3K9me3-Ub2 and hDNMT1<sub>RFTS</sub>-H3Ub2 complexes (PDB 5WVO), with the H3K9me3-binding sites shown in the expanded view. (C) Sequence alignment of the DNMT1 RFTS domain from human (hDNMT1), bovine (bDNMT1), mouse (mDNMT1), *Xenopus Laevis* (xDNMT1) and Zebrafish (zDNMT1). Strictly conserved residues are colored in white and shaded in red. Similar residues are colored in red. The secondary structures corresponding to hDNMT1 RFTS are marked on top. The residues for interaction with H3K9me3 peptide are marked by blue arrows. The residues for interacting with ubiquitin molecules are marked by dark arrows. The H3 K9me3-interacting residues are marked by red arrows.

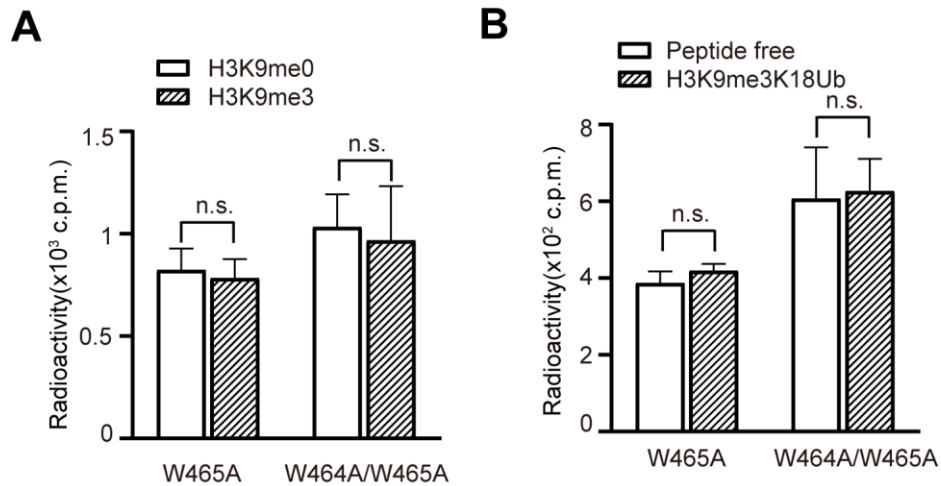

**Figure S3. *In vitro* DNA methylation assays of hDNMT1<sub>351-1600</sub> mutants with H3 peptide.**

(A) DNA methylation activity of W465A- or W464A/W465A-mutated hDNMT1<sub>351-1600</sub> in the presence of H3K9me0 or H3K9me3 peptides. (B) DNA methylation activity of W465A- or W464A/W465A-mutated hDNMT1<sub>351-1600</sub> in the absence or presence of the H3K9me3Ub. Mean and s.d. were derived from three independent measurements. (n.s. not significant).



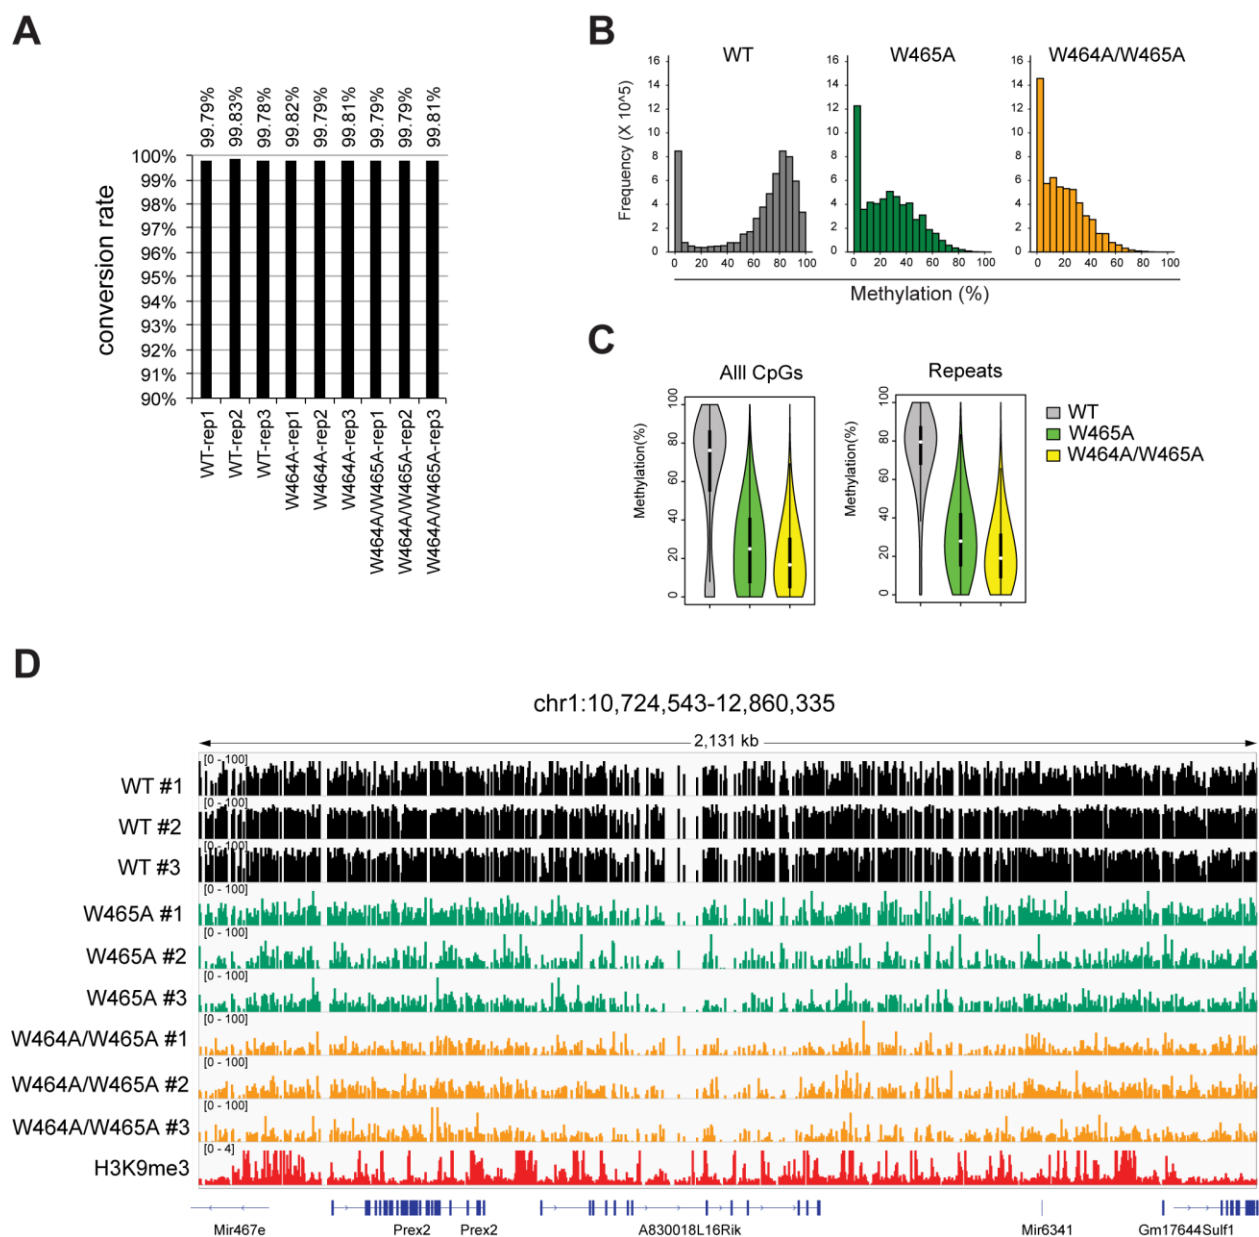

**Figure S4. eRRBS profilings of DNA methylation in 1KO-ESC cells reconstituted with either WT or RFTS-mutated DNMT1.**

(A) The rates of bisulfite conversion, labeled on top of columns, for all cytosines in each 1KO-ESC cell sample with expression of the indicated DNMT1, as determined by the unmethylated lambda DNA used as spike-in controls. (B) Distribution of absolute methylation levels for CpG sites with >5 coverage among 1KO-ESC lines with stable expression of the indicated DNMT1, as detected by eRRBS. (C) Violin plots showing distribution of absolute methylation levels for CpG sites with >5 coverage at all CpG sites or those within the repeated genomic sequences among the indicated cells samples. White dots are the median and box lines are the first and third quartile of the data. (D) Representative IGV views of CpG methylations at an H3K9me3 (red, bottom)

marked genomic region located in the chromosome 1 among three replicated 1KO-ESC lines with stable expression of the indicated DNMT1. Cytosines covered by at least 5 reads according to eRRBS data are shown, with each site designated by a vertical line.

**Table S1. Summary of ITC binding parameters.**

| Protein                             | Peptide                       | $K_d$ ( $\mu\text{M}$ ) | N value   |
|-------------------------------------|-------------------------------|-------------------------|-----------|
| hDNMT1 <sub>RFTS</sub> , WT         | H3(1-22) <sup>#</sup>         | 6.4 ± 0.8               | 0.74±0.05 |
| hDNMT1 <sub>RFTS</sub> , WT         | H3(1-22)K9me3 <sup>#</sup>    | 1.3 ± 0.1               | 0.77± 0.1 |
| hDNMT1 <sub>351-1600</sub> , WT     | H3(1-24)Ub2 <sup>#</sup>      | 0.091 ±0.02             | 0.91± 0   |
| hDNMT1 <sub>351-1600</sub> , WT     | H3(1-24)K9me3Ub2 <sup>#</sup> | 0.017 ± 0.003           | 0.96±0.1  |
| hDNMT1 <sub>RFTS</sub> , WT         | H3(1-22)K9Ac                  | 61 ± 14                 | 0.95±0.1  |
| hDNMT1 <sub>RFTS</sub> , WT         | H3(1-15)K4me3                 | 284 ± 32                | 1.0*      |
| hDNMT1 <sub>RFTS</sub> , WT         | H3(21-33)K27me3               | NDB                     |           |
| hDNMT1 <sub>RFTS</sub> , WT         | H3(31-43)K36me3               | 562 ±77                 | 1.0*      |
| hDNMT1 <sub>RFTS</sub> , WT         | H4(14-25)K20me3               | 339 ±11                 | 1.0*      |
| hDNMT1 <sub>RFTS</sub> , W465A      | H3(1-22)K9me3                 | 22 ± 0.7                | 1.1±0.04  |
| hDNMT1 <sub>RFTS</sub> , W465A      | H3(1-22)                      | 30 ± 6                  | 1.0±0.2   |
| hDNMT1 <sub>RFTS</sub> , W464AW465A | H3(1-22)K9me3                 | NDB                     |           |

NDB, no detectable binding. \*The N value was set manually. <sup>#</sup>The mean value and S.D. were derived from two-independent measurements.

**Table S2. Data collection and refinement statistics.**

| bDNMT1 RFTS –<br>Ubiquitin – H3K9me3<br>(PDB: 6PZV) |                                    |
|-----------------------------------------------------|------------------------------------|
| <b>Data collection</b>                              |                                    |
| Space group                                         | P 2 <sub>1</sub> 2 <sub>1</sub> 2  |
| Cell dimensions                                     |                                    |
| <i>a</i> , <i>b</i> , <i>c</i> (Å)                  | 70.3, 196.4, 67.7                  |
| $\alpha$ , $\beta$ , $\gamma$ (°)                   | 90, 90, 90                         |
| Resolution (Å)                                      | 49.11-3.01(3.12-3.01) <sup>a</sup> |
| <i>R</i> <sub>merge</sub>                           | 0.126(1.023)                       |
| <i>I</i> / $\sigma$ ( <i>I</i> )                    | 12.3(1.3)                          |
| <i>CC</i> <sub>1/2</sub>                            | 0.998(0.583)                       |
| Completeness (%)                                    | 99.1(92.3)                         |
| Redundancy                                          | 9.8(7.9)                           |
| <b>Refinement</b>                                   |                                    |
| No. reflections                                     | 19,094                             |
| <i>R</i> <sub>work</sub> / <i>R</i> <sub>free</sub> | 0.212/0.275                        |
| No. atoms                                           |                                    |
| Protein                                             | 6184                               |
| Zn <sup>2+</sup>                                    | 2                                  |
| Water                                               | 48                                 |
| <i>B</i> factors (Å <sup>2</sup> )                  |                                    |
| Protein                                             | 85.1                               |
| Zn <sup>2+</sup>                                    | 82.0                               |
| Water                                               | 67.5                               |
| r.m.s deviations                                    |                                    |
| Bond lengths (Å)                                    | 0.003                              |
| Bond angles (°)                                     | 0.588                              |

<sup>a</sup>Values in parentheses are for highest-resolution shell.

**Legend for Table S3: Summary of eRRBS data analysis.**
